# Supplementary material for: Magnitude of occupational exposure to sharp injuries among nurses working in South Gondar zone public hospitals, Northcentral Ethiopia: institution-based cross-sectional study
Source: PubMed Central journal article supplement — BMJ Open. 2023 Nov 1;13(11):e073595. doi: 10.1136/bmjopen-2023-073595 (PMC10626832; doi:10.1136/bmjopen-2023-073595), 2023-11-01
Supplement: bmjopen-2023-073595.draft_revisions.pdf [file bmjopen-2023-073595.draft_revisions.pdf]

# BMJ Open

BMJ Open is committed to open peer review. As part of this commitment we make the peer review history of every article we publish publicly available.

When an article is published we post the peer reviewers' comments and the authors' responses online. We also post the versions of the paper that were used during peer review. These are the versions that the peer review comments apply to.

The versions of the paper that follow are the versions that were submitted during the peer review process. They are not the versions of record or the final published versions. They should not be cited or distributed as the published version of this manuscript.

BMJ Open is an open access journal and the full, final, typeset and author-corrected version of record of the manuscript is available on our site with no access controls, subscription charges or pay-per-view fees (<http://bmjopen.bmj.com>).

If you have any questions on BMJ Open's open peer review process please email [info.bmjopen@bmj.com](mailto:info.bmjopen@bmj.com)

# BMJ Open

## **Burden of Occupational Exposure to Sharp Injuries among Nurses Working in Public Hospitals in South Gondar Zone, Northcentral Ethiopia: Multi-center cross-sectional study**

|                               |                                                                                                                                                                                                               |
|-------------------------------|---------------------------------------------------------------------------------------------------------------------------------------------------------------------------------------------------------------|
| Journal:                      | <i>BMJ Open</i>                                                                                                                                                                                               |
| Manuscript ID                 | bmjopen-2023-073595                                                                                                                                                                                           |
| Article Type:                 | Original research                                                                                                                                                                                             |
| Date Submitted by the Author: | 16-Mar-2023                                                                                                                                                                                                   |
| Complete List of Authors:     | Aytenew, Tigabu; Debre Tabor University, Department of Nursing<br>Kassie, Yohannes Tesfahun; Debre Tabor University<br>Kebede, Solomon; Debre Tabor University, Department of Pediatrics and Neonatal Nursing |
| Keywords:                     | Aged, Pain management < ANAESTHETICS, COVID-19, EPIDEMIOLOGY, Leukaemia < HAEMATOLOGY                                                                                                                         |
|                               |                                                                                                                                                                                                               |

SCHOLARONE™  
Manuscripts

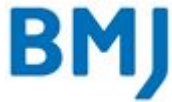

I, the Submitting Author has the right to grant and does grant on behalf of all authors of the Work (as defined in the below author licence), an exclusive licence and/or a non-exclusive licence for contributions from authors who are: i) UK Crown employees; ii) where BMJ has agreed a CC-BY licence shall apply, and/or iii) in accordance with the terms applicable for US Federal Government officers or employees acting as part of their official duties; on a worldwide, perpetual, irrevocable, royalty-free basis to BMJ Publishing Group Ltd ("BMJ") its licensees and where the relevant Journal is co-owned by BMJ to the co-owners of the Journal, to publish the Work in this journal and any other BMJ products and to exploit all rights, as set out in our [licence](#).

The Submitting Author accepts and understands that any supply made under these terms is made by BMJ to the Submitting Author unless you are acting as an employee on behalf of your employer or a postgraduate student of an affiliated institution which is paying any applicable article publishing charge ("APC") for Open Access articles. Where the Submitting Author wishes to make the Work available on an Open Access basis (and intends to pay the relevant APC), the terms of reuse of such Open Access shall be governed by a Creative Commons licence – details of these licences and which [Creative Commons](#) licence will apply to this Work are set out in our licence referred to above.

Other than as permitted in any relevant BMJ Author's Self Archiving Policies, I confirm this Work has not been accepted for publication elsewhere, is not being considered for publication elsewhere and does not duplicate material already published. I confirm all authors consent to publication of this Work and authorise the granting of this licence.

1  
2  
3 1 **Burden of Occupational Exposure to Sharp Injuries among Nurses Working in**  
4  
5 2 **Public Hospitals in South Gondar Zone, Northcentral Ethiopia: Multi-center cross-**  
6  
7 **sectional study**  
8  
9

10 4 Tigabu Munye Aytene<sup>1\*</sup>, Yohannes Tesfahun Kassie<sup>2</sup>, Solomon Demis Kebede<sup>3</sup>

11  
12 5 <sup>1</sup>Department of Nursing, College of Health Sciences, Debre Tabor University, Debre  
13  
14 Tabor, Ethiopia  
15

16  
17 7 <sup>2</sup>College of Health Sciences, Debre Tabor University, Debre Tabor, Ethiopia  
18

19 8 <sup>3</sup>Department of Pediatrics and Neonatal Nursing, College of Health Sciences, Debre  
20  
21 Tabor University, Debre Tabor, Ethiopia  
22

23  
24 10 \*Corresponding author: Tigabu Munye Aytene. *Tele: +251921613861 Fax:*

25  
26 11 0581410533, and  
27

28 12 *Email: [tigabumunye21@gmail.com](mailto:tigabumunye21@gmail.com)*  
29

30  
31 13 YT: [tesfahunyohannes08@gmail.com](mailto:tesfahunyohannes08@gmail.com)  
32

33 14 SD: [solomondemis@gmail.com](mailto:solomondemis@gmail.com)  
34  
35  
36  
37  
38  
39  
40  
41  
42  
43  
44  
45  
46  
47  
48  
49  
50  
51  
52  
53  
54  
55  
56  
57  
58  
59  
60

## 19 Abstract

20 **Background:** Sharp injuries are the most common and preventable occupational  
21 hazards that health care workers are exposed to the transmission of a variety of blood  
22 borne infections such as HBV, HCV, and HIV/AIDS. Most of these sharp injuries (90%)  
23 occur in developing countries, where the burden of blood borne infections in the general  
24 population is high and access to safety devices and personal protective equipments is  
25 limited. However, there is limited information in the study area that describes the burden  
26 of occupational exposure to sharp injuries and its predictors among nurses.

27 **Objective:** This study aimed to assess the burden of occupational exposure to sharp  
28 injuries and its predictors among nurses working in public hospitals in south Gondar.

29 **Method:** A multi-center cross-sectional study design was conducted among nurses  
30 from November 01-30/2022. A total of 376 nurses working in all public hospitals were  
31 included in the study. The collected data were checked for completeness, cleaned,  
32 coded manually, and entered into Epi-Data version 4.2; then, exported to Stata version  
33 14 for analysis. Variables with a p-value of <0.05 at 95% CI were considered  
34 significantly associated with the outcome variable.

35 **Results:** Of the total respondents, 213 (56.65%) were between the age of 25-34 with  
36 the mean  $\pm$  SD of age 30.22  $\pm$  6.63 years. Similarly, 202 (53.72%) of the respondents  
37 were females. This study finding showed that the burden of occupational exposure to  
38 sharp injuries among nurses was 52.39% (95%CI: 47.92%, 56.37%).

39 **Conclusions:** Generally, this study finding reported that the burden of occupational  
40 exposure to sharp injuries among nurses was high. This study finding also showed that  
41 years of service, infection prevention training, job related stress, and the presence of

1  
2  
3 42 contaminated sharps at workplace were independent predictors of occupational  
4  
5 43 exposure to sharp injuries among nurses.  
6

7  
8 44 **Keywords:** Occupational exposure to sharp injuries, nurses, and public hospitals.  
9

## 10 45 **Background**

11  
12 46 A sharp injury is defined as "an accidental penetrating wound with an instrument that is  
13  
14 47 potentially contaminated with the body fluid of another person. And, sharp injuries occur  
15  
16 48 when health care providers perform their clinical activities in the health care facilities,  
17  
18 49 such as hospitals, health centers and clinics"[1]. The majority of sharp injuries occur  
19  
20 50 during administering injections, securing IV lines, drawing blood, checking blood sugar  
21  
22 51 ,recapping needles, poor handling and disposing of needles, and transferring blood or  
23  
24 52 body fluids from a syringe to a specimen container [2].  
25  
26  
27  
28

29 53 Globally, of the total of 35 million health care providers, it is estimated that 3 million  
30  
31 54 experience sharp injuries every year; of these, nurses are at the greatest risk, with up to  
32  
33 55 50% of all sharp injuries being sustained by nurses [3]. Because nurses have the  
34  
35 56 highest rate of encountering sharp injuries among health care providers due to their  
36  
37 57 prolonged exposure to needles and other sharp devices [4]. The European Biosafety  
38  
39 58 Network (EBN) reported that one million sharp injuries occur in European countries  
40  
41 59 annually [5].  
42  
43  
44

45 60 Most of these sharp injuries (90%) occur in developing countries, where the burden of  
46  
47 61 blood borne infections in the general population is high and access to safety devices  
48  
49 62 and personal protective equipments (PPEs) is limited, specifically more common in sub-  
50  
51 63 Saharan African countries. On average, health care providers in Africa suffer 2 to 4  
52  
53 64 sharp injuries every year [6]. In Sub-Saharan Africa, the burden of sharp injuries and  
54  
55  
56  
57  
58  
59  
60

1  
2  
3 65 their predictors are not clearly understood among health care providers [7]. In Ethiopia,  
4  
5 66 a study conducted in Jimma University Specialized Teaching Hospital(JUSTH ) reported  
6  
7 67 that the burden of occupational exposure to sharp injuries among nurses was 61.76%  
8  
9  
10 68 [1, 8]. Sharp injuries are markedly the most common and preventable occupational  
11  
12 69 hazards that health care providers are exposed to and become high risk for the  
13  
14 70 transmission of a variety of blood borne infections such as hepatitis B virus(HBV),  
15  
16 71 hepatitis C virus(HCV), and human immunodeficiency virus (AIDS) [3, 9].

17  
18  
19 72 Blood-borne infections following sharp injuries have serious consequences, including  
20  
21 73 long-term illness, psychological stress to the victims ,colleagues and family, disability  
22  
23  
24 74 and death [10]. In addition to the potential risks for infectious diseases, they also suffer  
25  
26 75 for direct costs required for laboratory tests, including tests for HIV antibodies, hepatitis  
27  
28 76 B serology, and a baseline test for hepatitis C, as well as any treatments for these  
29  
30  
31 77 infections [11]. The implementation of education, universal precautions, elimination of  
32  
33 78 needle recapping, and use of sharp containers for safe disposal have reduced the  
34  
35  
36 79 chance of getting sharp injuries by 80% [12]. Health care providers who followed  
37  
38 80 universal precautions were 66% less likely to have needle sticks and sharp injuries than  
39  
40  
41 81 those who did not follow [13].

42  
43 82 Training of handling objects, using instruments to grasp needles, reduction of the use of  
44  
45 83 sharp devices, avoiding hand-to-hand passing of sharp instruments, decreasing of  
46  
47 84 direct contact with needles, an appropriate disposal and using safety boxes properly  
48  
49 85 can decrease the risk of getting sharp injuries [5].

50  
51  
52 86 In Ethiopia, where primary health care services are covered by nurses, it is important to  
53  
54 87 develop their knowledge and practice on universal precautions since the risks of getting

1  
2  
3 88 infections following sharp injuries are high in their day to day activities [8]. However,  
4  
5 89 there is limited information in the study area that describes the burden of sharp injuries  
6  
7  
8 90 and its predictors among nurses. Therefore, this study aimed to determine the burden of  
9  
10 91 occupational exposure to sharp injuries and its predictors.

## 92 **General objective**

93 To assess the burden of occupational exposure to sharp injuries among nurses working  
94 in public hospitals in south Gondar zone, Northcentral Ethiopia, 2022

## 95 **Specific objectives**

- 96 ◆ To determine the burden of occupational exposure to sharp injuries among nurses  
97 working in public hospitals in south Gondar zone, Northcentral Ethiopia, 2022  
98 ◆ To identify the predictors of occupational exposure to sharp injuries among nurses  
99 working in public hospitals in south Gondar zone, Northcentral Ethiopia, 2022

## 100 **Methods**

### 101 **Study design, area, and Period**

102 Multi-center cross-sectional study design was conducted among nurses working in  
103 public hospitals in south Gondar zone from November 01-30, 2022.

### 104 **Study Population**

105 All nurses working in all public hospitals in south Gondar zone.

### 106 **Inclusion and exclusion criteria**

107 All nurses working in all public hospitals in south Gondar zone at the time of the data  
108 collection period were included in the study; whereas, nurses who were on sick leave,  
109 maternity leave, annual leave, and training at the time of data collection period were  
110 also excluded from the study.



## 111 **Sample size determination, and sampling procedure/technique**

112 The sample size (n) was calculated by Computer-based Epi info7 software using a  
 113 single population proportion at 95% CI, with a 5% margin of error, and by assuming the  
 114 burden of occupational exposure to sharp injuries among nurses to be 61.76% [1].

$$n = \frac{(Z\alpha/2)^2 P (1-P)}{d^2}$$

117 *Where:* - n= the minimum sample size required for the study

118 Z= standard normal distribution (Z=1.96) with a 95% confidence interval

119 P= burden of occupational exposure to sharp injuries among nurses

120 (61.76%=0.6176)

121 d= is a tolerable margin of error (d=5%=0.05)

$$n = \frac{(1.96)^2 0.6176(1-0.6176)}{(0.05)^2}$$

124 n=363. Then, by adding a 10% (0.1) non-response rate, the final sample size  
 125 (n) was calculated to be 400. But, since it was the minimum sample size required, and  
 126 the source population was only 402, the source population (402) was taken as a sample  
 127 size for this study.

### 128 **Dependent Variable**

129 Occupational exposure to sharp injuries

### 130 **Independent variables**

- 131 ■ Socio-demographic characteristics: Age, sex, marital status, level of education, and  
 132 years of service.
- 133 ■ Behavioral characteristics: Sleeping disturbance, following of standard precaution  
 134 guide line, use of PPE, knowledge of standard precautions, and job-related stress.

- 1  
2  
3 135   ▪ Work environment characteristics: Length of stay/shift, health and safety information  
4  
5 136       access, infection prevention training, work load, availability of safety box, availability  
6  
7 137       of standard precaution guidelines, and presence of contaminated sharps.  
8  
9

## 10 138   **Operational Definitions**

11  
12  
13 139   **Occupational exposure to sharp injuries:** Any kind of sharp injury which occurred  
14  
15 140   among nurses in relation to his/her job in the health care facility [14].  
16

17 141   **Knowledge:** Nurses who have scored  $\geq 75\%$  (9) of 12 knowledge related questions  
18  
19 142   were considered to have adequate knowledge; whereas, nurses who have scored  
20  
21 143   below 75% were also considered to have inadequate knowledge towards sharp injuries  
22  
23 144   [15].  
24  
25

26 145   **Job Stress:** Nurses who scored above or equal to the mean score (32.78) of the Likert-  
27  
28 146   scale questions that used to assess nurses' job-related stress were considered they  
29  
30 147   have a job related stress, whereas, nurses who scored below the mean score were also  
31  
32 148   considered they didn't have job-related stress [14].  
33  
34  
35

## 36 149   **Data collection tool and procedure**

37  
38 150   A structured and pre-tested self-administered English version questionnaire was used to  
39  
40 151   collect the data. The questionnaire was prepared by reviewing different literatures and  
41  
42 152   using standardized Likert-scale questions to assess job-related stress of the  
43  
44 153   respondents, which were adopted from the Expanded Nursing Stress Scale (ENSS) [1,  
45  
46 154   8, 14].  
47

48  
49  
50 155   The questionnaire contains nurses' socio-demographic, behavioral, environmental  
51  
52 156   characteristics, knowledge questions related to standard precaution and standardized  
53  
54 157   Likert-scale questions to assess job-related stress of the respondents. Reliability of the  
55  
56  
57

1  
2  
3 158 tool was established with an overall Cronbach's alpha score (0.74 for knowledge  
4  
5 159 questions related to standard precaution, and 0.79 for job stress Likert-scale questions.  
6  
7 160 Before data collection, training was given to the data collectors. Before giving the  
8  
9 161 questionnaire, the data collectors informed the nurses about the aims/purposes, risks  
10  
11 162 and possible benefits of the study, the right and refusal to participate in the study and  
12  
13 163 that the collected information would be kept confidential.  
14  
15 164 After all, those nurses who were willing and have signed the informed voluntary consent  
16  
17 165 form were requested to fill out the questionnaire. The data collection was held for four  
18  
19 166 consecutive weeks (from November 01-30/2022).  
20  
21  
22  
23

### 24 167 **Data quality control, processing, and analysis**

25  
26 168 Five percent of the questionnaire was pre-tested in Koladiba primary hospital to assess  
27  
28 169 the reliability, clarity, sequence, consistency, understandability and the total time that it  
29  
30 170 will take to finish the questionnaire before the actual data collection. Then, the  
31  
32 171 necessary comments and feedback were incorporated into the final tool to improve its  
33  
34 172 quality. Training was given data collectors regarding the objective of the study, data  
35  
36 173 collection tools, methods of data collection, checking the completeness of the collected  
37  
38 174 data, and how to maintain confidentiality.  
39  
40  
41

42 175 The collected data were checked for completeness, cleaned, edited, coded manually  
43  
44 176 and entered into Epi data version 4.2. A double data entry was done for its validity and  
45  
46 177 compared to the original data. Outliers were also checked & simple frequencies and  
47  
48 178 cross tabulation were done for missing values and variables. Then, the data was  
49  
50 179 exported to Stata version 14 for analysis. Descriptive analysis was done by computing  
51  
52 180 proportions and summary statistics. Then, the information was presented using simple  
53  
54  
55  
56  
57  
58  
59  
60

1  
2  
3 181 frequencies, summary measures, tables and figures. Binary logistic regression was  
4  
5 182 used to identify predictors of sharp injuries. Bivariate and multivariate analyses were  
6  
7 183 used to see the association between the outcome variable and each independent  
8  
9  
10 184 variable.

11  
12 185 The assumptions for binary logistic regression were checked. The goodness of fit was  
13  
14 186 tested by Hosmer-Lemeshow statistics and Omnibus tests. All variables with  $P < 0.2$  in  
15  
16 187 the bivariate analysis were included in the final model of multivariate analysis in order to  
17  
18 188 control all the possible confounders and the variables were selected by using enter  
19  
20 189 method. The adjusted odds ratio (AOR) along with a 95% CI was estimated to identify  
21  
22 190 the predictors of occupational exposure to sharp injuries. In this study, variables with a  
23  
24 191 P-value  $< 0.05$  were considered significantly associated with occupational exposure to  
25  
26 192 sharp injuries.

### 30 193 **Ethical Considerations**

31  
32  
33 194 Ethical clearance was obtained from Debre Tabor University, College of Health  
34  
35 195 Sciences, ethical review board. All the respondents were informed about the purpose of  
36  
37 196 the study, their right to refuse and written and signed voluntary consent was obtained  
38  
39 197 from all the respondents prior to data collection. The respondents were told that the  
40  
41 198 information obtained from them would be treated with complete confidentiality and  
42  
43 199 would not cause any harm to them.

### 46 200 **Result**

47  
48  
49 201 Of the total of 402 respondents, 376 were included in the final analysis, giving a  
50  
51 202 response rate of 93.53%.

### 54 203 **Socio-demographic and working environment related attributes**

204 Of the total respondents, 213 (56.65%) were between the age of 25-34 with the mean  $\pm$   
 205 SD of age  $30.22 \pm 6.63$  years. Similarly, 202 (53.72%) of the respondents were females.  
 206 Additionally, only 89 (23.67%) of the respondents got infection prevention training.  
 207 Moreover, 271 (72.07%) of them had safety boxes at workplace to dispose needles and  
 208 other sharp materials after use, and 214 (56.91%) of respondents also stated that there  
 209 were contaminated needles and sharp materials at workplace (Table 1).

210 Table1: Socio-demographic characteristics of the respondents working in public  
 211 hospitals in south Gondar zone, Northcentral Ethiopia, 2022 (n=376).

| Variables                    | Category         | Frequency | Percentage (%) |
|------------------------------|------------------|-----------|----------------|
| Age                          | $\leq 24$        | 68        | 18.09          |
|                              | 25-34            | 213       | 56.65          |
|                              | 35-44            | 71        | 18.88          |
|                              | $\geq 45$        | 24        | 6.38           |
| Sex                          | Male             | 174       | 46.28          |
|                              | Female           | 202       | 53.72          |
| Marital status               | Single           | 171       | 45.48          |
|                              | Married          | 183       | 48.67          |
|                              | Divorced         | 17        | 4.52           |
|                              | Widowed          | 5         | 1.33           |
| Educational level            | Diploma          | 132       | 35.11          |
|                              | BSc              | 244       | 64.89          |
| Years of service             | <5               | 136       | 36.17          |
|                              | 5-10             | 128       | 34.04          |
|                              | >10              | 112       | 29.79          |
| Sleeping disturbance problem | Yes              | 274       | 72.87          |
|                              | No               | 102       | 27.13          |
| Use of PPEs                  | All of the time  | 185       | 49.20          |
|                              | Most of the time | 102       | 27.13          |
|                              | Sometimes        | 73        | 19.41          |
|                              | Never use        | 16        | 4.26           |
| Work load in the unit        | Yes              | 212       | 56.38          |
|                              | No               | 164       | 43.62          |
| Length of stay/shift at work | $\leq 8$ hours   | 193       | 51.33          |

|                                              |                      |     |       |
|----------------------------------------------|----------------------|-----|-------|
|                                              | 9-14 hours           | 35  | 9.31  |
|                                              | ≥15 hours            | 148 | 39.36 |
| Health and safety information access         | Yes                  | 291 | 77.39 |
|                                              | No                   | 85  | 22.61 |
| Training on IP                               | Yes                  | 89  | 23.67 |
|                                              | No                   | 287 | 76.33 |
| Availab. of safety box at work place         | Yes                  | 271 | 72.07 |
|                                              | No                   | 105 | 27.93 |
| Availab. of universal precaution guide line  | Yes                  | 212 | 56.38 |
|                                              | No                   | 164 | 43.62 |
| Following universal precaution guide line    | Yes                  | 93  | 43.87 |
|                                              | No                   | 119 | 56.13 |
| Presence of contaminated sharps at workplace | Yes                  | 214 | 56.91 |
|                                              | No                   | 162 | 43.09 |
| Knowledge of standard precaution             | Adequate knowledge   | 134 | 35.64 |
|                                              | Inadequate knowledge | 242 | 64.36 |
| Job related stress                           | Stressed             | 237 | 63.03 |
|                                              | Not stressed         | 139 | 36.97 |

212 \*BSc, Bachelor of Science; \*IP, infection prevention

### 213 **Burden of occupational exposure to sharp injuries**

214 This study finding showed that the burden of occupational exposure to sharp injuries  
215 among nurses was 52.39% (95%CI: 47.92%, 56.37%) (197).

216 The occurrence of occupational exposure to sharp injuries was the highest among  
217 respondents with the age of 45 years and above (62.50). Likewise, the majority of  
218 males, 108(62.07) also got occupational exposure to sharp injuries. Occupational  
219 exposure to sharp injuries was also the highest among diploma nurses, and nurses  
220 having more than 10 years of service (59.85% and 62.50%) respectively. Moreover, the  
221 occurrence of sharp injuries was also the highest among nurses working along with the  
222 presence of contaminated sharps at workplace (Table 2).

223 Table 2: Distribution of sharp injuries among nurses working in public hospitals in south  
 224 Gondar zone, Northcentral Ethiopia, 2022 (n=376).

| Variables                          | Categories       | Occupational exposure to sharp injuries |            |
|------------------------------------|------------------|-----------------------------------------|------------|
|                                    |                  | Yes (%)                                 | No (%)     |
| Age                                | ≤24              | 32(47.06)                               | 36(52.94)  |
|                                    | 25-34            | 111(52.11)                              | 102(47.89) |
|                                    | 35-44            | 39(54.93)                               | 32(45.07)  |
|                                    | ≥45              | 15(62.50)                               | 9(37.50)   |
| Sex                                | Male             | 108(62.07)                              | 66(37.93)  |
|                                    | Female           | 89(44.06)                               | 113(55.94) |
| Marital status                     | Single           | 87(50.88)                               | 84(49.12)  |
|                                    | Married          | 96(52.46)                               | 87(47.54)  |
|                                    | Divorced         | 11(64.71)                               | 6(32.29)   |
|                                    | Widowed          | 3(60.0)                                 | 2(40.0)    |
| Educational level                  | Diploma          | 79(59.85)                               | 53(40.15)  |
|                                    | BSc              | 118(48.36)                              | 126(51.64) |
| Year of service                    | <5               | 59(43.38)                               | 77(56.62)  |
|                                    | 5-10             | 68(53.13)                               | 60(46.87)  |
|                                    | >10              | 70(62.50)                               | 42(37.50)  |
| Sleeping disturbance problem       | Yes              | 141(51.46)                              | 133(48.54) |
|                                    | No               | 56(54.90)                               | 46(45.10)  |
| Use of PPEs                        | All of the time  | 89(48.11)                               | 96(51.89)  |
|                                    | Most of the time | 56(54.90)                               | 46(45.10)  |
|                                    | Sometimes        | 41(56.16)                               | 32(43.84)  |
|                                    | Never use        | 11(58.75)                               | 5(31.25)   |
| Work load                          | Yes              | 125(58.96)                              | 87(41.04)  |
|                                    | No               | 72(43.90)                               | 92(56.10)  |
| Length of stay/shift at work       | ≤8 hours         | 95(49.22)                               | 98(50.78)  |
|                                    | 9-14 hours       | 19(54.29)                               | 16(45.71)  |
|                                    | ≥15 hours        | 83(56.08)                               | 65(43.92)  |
| Health & safety information access | Yes              | 148(50.86)                              | 143(49.14) |
|                                    | No               | 49(57.65)                               | 36(42.35)  |
| Training on IP                     | Yes              | 38(42.70)                               | 51(57.30)  |
|                                    | No               | 159(55.40)                              | 128(44.60) |
| Availab. of safety box             | Yes              | 129(47.60)                              | 142(52.40) |
|                                    | No               | 68(64.76)                               | 37(35.24)  |
| Availab. of universal              | Yes              | 99(46.70)                               | 113(53.30) |

|                                              |                      |             |             |
|----------------------------------------------|----------------------|-------------|-------------|
| precaution guide line                        | No                   | 98(59.76)   | 66(40.24)   |
| Following universal precaution guide line    | Yes                  | 42 (45.16)  | 51(54.84)   |
|                                              | No                   | 155 (54.77) | 128 (45.23) |
| Presence of contaminated sharps at workplace | Yes                  | 136(63.55)  | 78(36.45)   |
|                                              | No                   | 61(37.65)   | 101(62.35)  |
| Knowledge of standard precaution             | Adequate knowledge   | 59(44.03)   | 75(55.97)   |
|                                              | Inadequate knowledge | 138(57.02)  | 104(42.98)  |
| Job related stress                           | Stressed             | 149(62.87)  | 88(37.13)   |
|                                              | Not stressed         | 48(34.53)   | 91(65.47)   |

225 \*BSc, Bachelor of Science; PPEs, personal protective equipments; and \*IP, infection  
226 prevention

### 227 Occupational exposure to sharp injuries related Attributes

228 Of the respondents who encountered occupational exposure to sharp injuries,  
229 114(57.87%) had encountered sharp injuries 1-2 times. Additionally, 69 (35.03%) of  
230 injuries occurred during abrupt movement of patients, and 86(43.65%) sharp injuries  
231 were slight skin penetration. Moreover, 93 (47.21%) of injuries were from the unknown  
232 status, and only 92 (46.70%) sharp injuries were reported to the concerned body (Table  
233 3).

234 Table 3: Occupational exposure to sharp injuries related attributes among nurses  
235 working in public hospitals in south Gondar zone, Northcentral Ethiopia, 2022 (n=376).

| Variables                      | Values                              | Frequency | Percentage (%) |
|--------------------------------|-------------------------------------|-----------|----------------|
| Frequency of injuries occurred | 1-2 times                           | 114       | 57.87          |
|                                | 3-4 times                           | 71        | 36.04          |
|                                | ≥5 times                            | 12        | 6.09           |
| Condition of sharps            | Dirty needles/sharps                | 74        | 37.56          |
|                                | Sterile needles/sharps              | 58        | 29.45          |
|                                | Both dirty & sterile needles/sharps | 65        | 32.99          |
| How sustaining injuries        | During abrupt movement              | 69        | 35.03          |



|                                      |                                          |     |       |
|--------------------------------------|------------------------------------------|-----|-------|
|                                      | of patients                              |     |       |
|                                      | During recapping needle after use        | 63  | 31.98 |
|                                      | During sharp collection                  | 46  | 23.35 |
|                                      | Others                                   | 19  | 9.64  |
| Type of injuries sustained           | Deep injury                              | 54  | 27.41 |
|                                      | Slight skin penetration                  | 86  | 43.65 |
|                                      | Superficial injury                       | 57  | 28.94 |
| Health status of the source patients | Known HIV/AIDS positive                  | 37  | 18.78 |
|                                      | Clinically suspected HIV/AIDS            | 40  | 20.30 |
|                                      | Clinically diagnosed hepatitis B patient | 27  | 13.17 |
|                                      | Unknown status                           | 93  | 47.21 |
| Report of the injuries               | Yes                                      | 92  | 46.70 |
|                                      | No                                       | 105 | 53.30 |

236 \*HIV/AIDS, Human immune deficiency virus/Acquired immune deficiency syndrome

### 237 **Distribution of sharp injuries by their type**

238 The major types of sharps that cause injuries to nurses were intravenous needles,  
 239 64(32.49%), intramuscular needles, 42(21.32%) and suturing needles, 36(18.27%)  
 240 (Figure1).

### 241 **Association between independent variables and occupational 242 exposure to sharp injuries**

243 Nurses having above 10 years of service were 2.35 times more likely to encounter  
 244 occupational exposure to sharp injuries than nurses having less than 5 years of service  
 245 ((AOR= 2.35, 95%CI: 1.21,4.57). On the other hand, nurses who got infection  
 246 prevention training were 46% less likely to encounter occupational exposure to sharp  
 247 injuries (AOR=0.54, 95%CI: 0.29,0.92). Additionally, nurses having job related stress  
 248 were also 2.24 times more likely to be exposed for sharp injuries (AOR=2.24, 95%CI:  
 249 1.27, 3.89), and nurses who were working in the area with the presence of

250 contaminated sharps were 2.76 times more likely to get the chance of occupational  
 251 exposure to sharp injuries (AOR=2.76, 95%CI: 1.67, 4.72) (Table 4).

252 Table 4: Showing the association between independent variables with occupational  
 253 exposure to sharp injuries among nurses working in public hospitals in south Gondar  
 254 zone, Northcentral Ethiopia, 2022 (n=376).

| Variables                                    | Categories           | Sharp injuries |             | COR (95%CI)      | AOR (95%CI)         |
|----------------------------------------------|----------------------|----------------|-------------|------------------|---------------------|
|                                              |                      | Yes (%)        | No (%)      |                  |                     |
| Sex                                          | Male                 | 108 (54.82)    | 66 (36.87)  | 2.15 (1.32,3.07) | 1.98 (0.91,4.21)    |
|                                              | Female               | 89 (45.18)     | 113 (63.13) | 1.00             | 1.00                |
| Year of service                              | <5                   | 59 (29.95)     | 77 (43.02)  | 1.00             | 1.00                |
|                                              | 5-10                 | 68 (34.52)     | 60 (33.52)  | 1.46 (0.87,2.42) | 1.38 (0.72,2.64)    |
|                                              | >10                  | 70 (35.53)     | 42 (23.46)  | 2.12 (1.26,3.49) | 2.35 (1.21,4.57)*** |
| Work load in the unit                        | Yes                  | 125 (63.45)    | 87 (48.60)  | 1.73 (1.15,2.52) | 1.42 (0.83,2.45)    |
|                                              | No                   | 72 (36.55)     | 92 (51.40)  | 1.00             | 1.00                |
| Training                                     | Yes                  | 38 (19.29)     | 51 (28.49)  | 0.48 (0.32,0.67) | 0.54(0.29,0.92)**** |
|                                              | No                   | 159 (80.71)    | 128 (71.51) | 1.00             | 1.00                |
| Nurses' knowledge of standard precaution     | Adequate knowledge   | 59 (29.95)     | 75 (41.90)  | 1.00             | 1.00                |
|                                              | Inadequate knowledge | 138 (70.05)    | 104 (58.10) | 1.96 (1.31,2.94) | 1.42 (0.79,2.39)    |
| Nurses' job stress level                     | Stressed             | 149 (75.63)    | 88 (49.16)  | 2.45 (1.62,3.67) | 2.24 (1.27,3.89)**  |
|                                              | Not stressed         | 48 (24.37)     | 91 (50.84)  | 1.00             | 1.00                |
| Presence of contaminated sharps at workplace | Yes                  | 136 (69.04)    | 78 (43.58)  | 2.71 (1.79,4.09) | 2.76 (1.67,4.72)*   |
|                                              | No                   | 61 (30.96)     | 101 (56.42) | 1.00             | 1.00                |

255 \*Significant at P=0.000, \*\*Significant at P=0.005, \*\*\*Significant at P=0.011, and  
 256 \*\*\*\*Significant at P=0.018.

## 257 Discussion

258 This study finding showed that the burden of occupational exposure to sharp injuries  
 259 among nurses was 52.39%. This study finding also reported that years of service,

1  
2  
3 260 infection prevention training, job related stress, and the presence of contaminated  
4  
5 261 sharps at work place were significantly associated with the occurrence of occupational  
6  
7  
8 262 exposure to sharp injuries among nurses.  
9

10 263 In this study, the burden of occupational exposure to sharp injuries among nurses was  
11  
12 264 52.39%. This finding is higher than a study conducted in three hospitals, Izmir,  
13  
14 265 Turkey(44.3%) [9], but lower than studies conducted in Public Sector Tertiary Care  
15  
16 266 Hospitals of Pakistan (67%) [16], and JUSH, Southwest Ethiopia (61.76%) [1]. This  
17  
18 267 variation might be due to the difference in study setting and period, as well as due to the  
19  
20 268 difference in infection prevention training and knowledge level of the respondents  
21  
22 269 towards standard precaution across study settings.  
23  
24  
25

26 270 In this study, year of service was significantly associated with the occurrence of  
27  
28 271 occupational exposure to sharp injuries among nurses at  $p < 0.05$ . This finding is similar  
29  
30 272 with studies conducted in three hospitals, Izmir, Turkey [9], and a secondary care  
31  
32 273 hospital, Gaza Strip [17], which showed that year of service had shown significant  
33  
34 274 association with the occurrence of occupational exposure to sharp injuries among  
35  
36 275 nurses at  $p < 0.05$ . It is due to the fact that as year of service increases, the chance of  
37  
38 276 getting occupational exposure to sharp injuries also increases.  
39  
40  
41

42 277 This study finding also indicated that nurses who got infection prevention training were  
43  
44 278 46% less likely to get the chance of occupational exposure to sharp injuries as  
45  
46 279 compared with nurses who didn't get the training. This finding is in line with a study  
47  
48 280 conducted in public hospitals of Jimma Zone, South West Ethiopia(8),which showed  
49  
50 281 that nurses who got infection prevention training were 88% less likely to get the chance  
51  
52 282 of getting occupational exposure to sharp injuries as compared with nurses who didn't  
53  
54  
55  
56  
57  
58  
59  
60

1  
2  
3 283 get the training. It is due to the fact that getting infection prevention training helps to  
4  
5 284 understand and practice the standard precaution guide line easily, which in turn reduces  
6  
7  
8 285 the chance of getting occupational exposure to sharp injuries.

9  
10 286 Similarly, this study finding also showed that job related stress was significantly  
11  
12 287 associated with the occurrence of occupational exposure to sharp injuries among  
13  
14  
15 288 nurses. This finding is comparable with a study conducted in JUSH; Southwest Ethiopia  
16  
17 289 which reported that job-related stress had shown significant association with the  
18  
19 290 occurrence of occupational exposure to sharp injuries among nurses [1]. It is due to the  
20  
21 291 fact that job-related stress might make nurses to lose their concentration and practice  
22  
23  
24 292 their daily activities unsafely.

25  
26 293 Moreover, this study finding also showed that the presence of contaminated needles  
27  
28 294 and sharp materials at work was also significantly associated with the occurrence of  
29  
30  
31 295 occupational exposure to sharp injuries among nurses at  $P < 0.05$ . This finding is in line  
32  
33 296 with a study conducted in JUSH, Southwest Ethiopia which reported the presence of  
34  
35 297 contaminated needles and sharp materials at the work place was significantly  
36  
37  
38 298 associated with the occurrence of occupational exposure to sharp injuries among  
39  
40 299 nurses at  $p < 0.05$  [1]. It is due to the fact that the presence of contaminated needles and  
41  
42 300 sharp materials at workplace increases the chance of getting occupational exposure to  
43  
44  
45 301 sharp injuries among nurses in their day-to-day workplace activities.

## 46 302 **Limitation of the Study**

47  
48  
49 303 This study might be subjected to recall and social desirability biases.

50  
51  
52 304 The study also might not show cause and effect relationships while the study design  
53  
54 305 was cross sectional.

## 306 **Conclusion**

307 Generally, this study finding reported that the burden of occupational exposure to sharp  
308 injuries among nurses was high. This study finding also showed that years of service,  
309 infection prevention training, job related stress, and the presence of contaminated  
310 sharps at workplace were independent predictors of occupational exposure to sharp  
311 injuries among nurses working in public hospitals in south Gondar zone.

## 312 **Recommendations**

- 313 1. The Ministry of health, Amhara regional health bureau, different NGOs, and hospital  
314 administrators in collaboration should strengthen regular provision of health & safety  
315 information and infection prevention training to nurses at all levels.
- 316 2. All stakeholders, including nursing staffs, should strengthen their efforts to work  
317 together to identify and manage those job-related stressors among nurses.
- 318 3. Safety boxes should be available in each working unit, and nurses should also  
319 practice proper use of safety box more than ever in order to avoid the presence of  
320 contaminated needles and other sharp materials at workplace.
- 321 4. Nurses should also use PPEs properly when handling and working with needles and  
322 other sharp materials in order to reduce the chance of getting occupational exposure to  
323 sharp injuries.

## 324 **Abbreviations and acronyms**

|     |      |                                     |
|-----|------|-------------------------------------|
| 325 | AIDS | Acquired Immune Deficiency Syndrome |
| 326 | AOR  | Adjusted Odds Ratio                 |
| 327 | CI   | Confidence Interval                 |
| 328 | EBN  | European Biosafety Network          |

1  
2  
3 329 ENSS Expanded Nursing Stress Scale  
4

5 330 HBV Hepatitis B Virus  
6

7 331 HCV Hepatitis C Virus  
8

9 332 HIV Human Immune deficiency Virus  
10

11 333 NGOs Non-Governmental Organizations  
12

13 334 PPEs Personal Protective Equipments  
14

15  
16  
17 335 **Consent for Publication**  
18

19 336 Not applicable  
20

21  
22 337 **Funding**  
23

24 338 Not applicable  
25

26  
27 339 **Data availability**  
28

29 340 All data used for the study were included in the manuscript.  
30

31  
32 341 **Competing interests**  
33

34 342 We declared that we have no any conflicts of interests.  
35

36  
37 343 **Authors' contributions**  
38

39 344 Tigabu Munye Aytenew: Wrote the research proposal, conducted the study, did data  
40 entry and analysis  
41  
42 345  
43

44 346 Yohannes Tesfahun Kassie: Involved in data entry and analysis  
45

46 347 Solomon Demis Kebede: Involved in proposal development, and data analysis.  
47  
48

49 348 **Acknowledgement**  
50

51 349 First and foremost, we would like to extend our deepest gratitude to Debre Tabor  
52 University, college of health science, for giving us the opportunity to conduct this study.  
53  
54  
55  
56  
57

351 Secondly, we would like to thank hospital administrators for their permission and unlimited  
352 support.

353 Lastly, we also give our heartfelt thanks to all nurses who have participated in this study.

## 354 **References**

- 355 1. Beker J, Bamlie T. Needle stick and sharp injuries and associated factors among  
356 nurses working in jimma university specialized hospital, south west Ethiopia. *Journal of*  
357 *Nursing & Care*. 2015;4:1-8.
- 358 2. Kumar A, Khuwaja AK, Khuwaja AM. Knowledge practice gaps about needle  
359 stick injuries among healthcare workers at tertiary care hospitals of Pakistan. *Journal of*  
360 *Ayub Medical College Abbottabad*. 2012;24(3-4):50-2.
- 361 3. Jahangiri M, Rostamabadi A, Hoboubi N, Tadayon N, Soleimani A. Needle stick  
362 injuries and their related safety measures among nurses in a university hospital, Shiraz,  
363 Iran. *Safety and health at work*. 2016;7(1):72-7.
- 364 4. Manzoor I, Daud S, Hashmi NR, Sardar H, Babar MS, Rahman A, et al. Needle  
365 stick injuries in nurses at a tertiary health care facility. *J Ayub Med Coll Abbottabad*.  
366 2010;22(3):174-8.
- 367 5. Geravandi S, Alavi SM, Yari AR, Yousefi F, Hosseini SA, Kamaei S, et al.  
368 *Epidemiological Aspects of Needle Stick Injuries Among Health Care Workers in Razi*  
369 *Hospital Ahvaz, Iran, in 2015*. *Archives of Hygiene Sciences*. 2016;5(2):85-91.
- 370 6. Mbaisi EM, Wanzala P, Omolo J. Prevalence and factors associated with  
371 percutaneous injuries and splash exposures among health-care workers in a provincial  
372 hospital, Kenya, 2010. *Pan African Medical Journal*. 2013;14(1).

- 1  
2  
3 373 7. Isara A, Oguzie K, Okpogoro O. Prevalence of needlestick injuries among  
4  
5 374 healthcare workers in the Accident and Emergency Department of a Teaching Hospital  
6  
7 375 in Nigeria. *Annals of medical and health sciences research*. 2015;5(6):392-6.  
8  
9  
10 376 8. Bidira K, Woldie M, Nemera G. Prevalence and predictors of needle stick injury  
11  
12 377 among nurses in public hospitals of Jimma Zone, South West Ethiopia. *International*  
13  
14 378 *Journal of Nursing and Midwifery*. 2014;6(7):90-6.  
15  
16  
17 379 9. Akyol A, Kargin C. Needle Stick and Sharp Injuries among Nurses. *Glob J Nurs*  
18  
19 380 *Forensic Stud*. 2016;1(109):2.  
20  
21  
22 381 10. Markovic-Denic L, Maksimovic N, Marusic V, Vucicevic J, Ostric I, Djuric D.  
23  
24 382 Occupational exposure to blood and body fluids among health-care workers in Serbia.  
25  
26 383 *Medical Principles and Practice*. 2015;24(1):36-41.  
27  
28  
29 384 11. Cho E, Lee H, Choi M, Park SH, Yoo IY, Aiken LH. Factors associated with  
30  
31 385 needlestick and sharp injuries among hospital nurses: a cross-sectional questionnaire  
32  
33 386 survey. *International journal of nursing studies*. 2013;50(8):1025-32.  
34  
35  
36 387 12. Vaz K, McGrowder D, Crawford T, Alexander-Lindo R, Irving R. Prevalence of  
37  
38 388 injuries and reporting of accidents among health care workers at the University Hospital  
39  
40 389 of the West Indies. *International journal of occupational medicine and environmental*  
41  
42 390 *health*. 2010;23(2):133-43.  
43  
44  
45 391 13. Bekele T, Gebremariam A, Kaso M, Ahmed K. Factors associated with  
46  
47 392 occupational needle stick and sharps injuries among hospital healthcare workers in Bale  
48  
49 393 Zone, Southeast Ethiopia. *PloS one*. 2015;10(10):e0140382.  
50  
51  
52  
53  
54  
55  
56  
57  
58  
59  
60



- 1  
2  
3 394 14. Aderaw Z. Assessment on magnitude of needle stick and sharp injuries and  
4  
5 395 associated factors among health care workers in East Gojjam zone health institutions,  
6  
7 396 Amahara Regional State, Ethiopia. *Global journal of medical research*. 2013;13(3).  
8  
9  
10 397 15. Tebeje B, Hailu C. Assessment of HIV post-exposure prophylaxis use among  
11  
12 398 health workers of governmental health institutions in Jimma Zone, Oromiya Region,  
13  
14 399 Southwest Ethiopia. *Ethiopian journal of health sciences*. 2010;20(1).  
15  
16  
17 400 16. Habib H, Khan EA, Aziz A. Prevalence and Factors Associated with eedle Stick  
18  
19 401 Injuries among Registered urses in Public Sector Tertiary Care Hospitals of Pakistan.  
20  
21 402 2011.  
22  
23  
24 403 17. Elsous A, Ouda M, Mohsen S, Shaikh MA, Mokayad S, Hamad AAR. Needle  
25  
26 404 stick injuries among nurses of secondary care hospital: A cross-sectional study from  
27  
28 405 Gaza Strip. 2016.  
29  
30  
31  
32 406  
33  
34  
35  
36  
37  
38  
39  
40  
41  
42  
43  
44  
45  
46  
47  
48  
49  
50  
51  
52  
53  
54  
55  
56  
57  
58  
59  
60

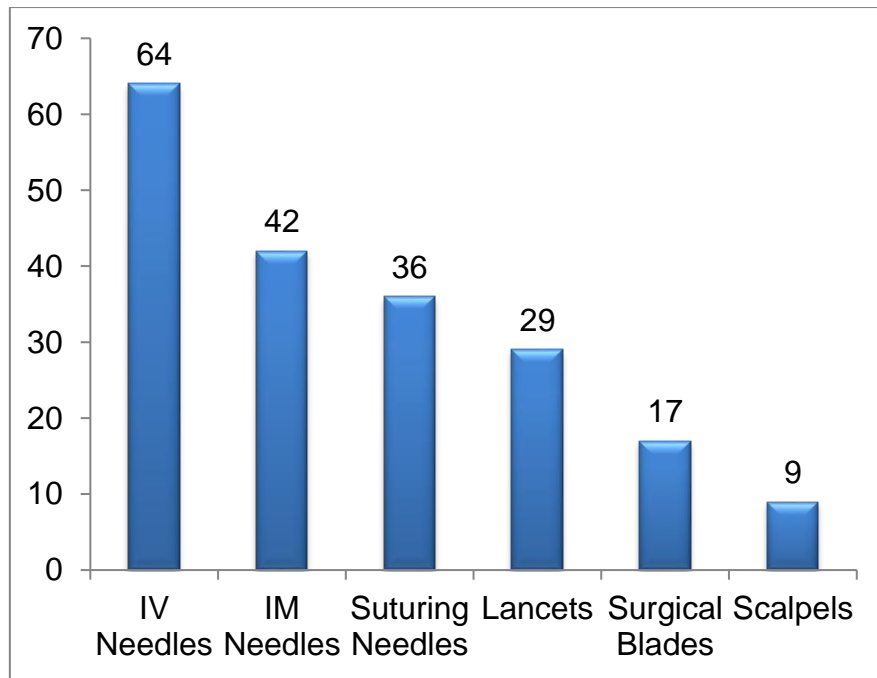

Figure 1: Distribution of sharp injuries by their type among nurses working in public hospitals in south Gondar zone, Northcentral Ethiopia, 2022 (n=376).

# Reporting checklist for cross sectional study.

Based on the STROBE cross sectional guidelines.

## Instructions to authors

Complete this checklist by entering the page numbers from your manuscript where readers will find each of the items listed below.

Your article may not currently address all the items on the checklist. Please modify your text to include the missing information. If you are certain that an item does not apply, please write "n/a" and provide a short explanation.

Upload your completed checklist as an extra file when you submit to a journal.

In your methods section, say that you used the STROBE cross sectional reporting guidelines, and cite them as:

von Elm E, Altman DG, Egger M, Pocock SJ, Gøtzsche PC, Vandenbroucke JP. The Strengthening the Reporting of Observational Studies in Epidemiology (STROBE) Statement: guidelines for reporting observational studies.

|                           |                     |                                                                                                                                    | Page<br>Number |
|---------------------------|---------------------|------------------------------------------------------------------------------------------------------------------------------------|----------------|
| <b>Title and abstract</b> |                     |                                                                                                                                    |                |
| Title                     | <a href="#">#1a</a> | Indicate the study's design with a commonly used term in the title or the abstract                                                 | 1              |
| Abstract                  | <a href="#">#1b</a> | Provide in the abstract an informative and balanced summary of what was done and what was found                                    | 1              |
| <b>Introduction</b>       |                     |                                                                                                                                    |                |
| Background /<br>rationale | <a href="#">#2</a>  | Explain the scientific background and rationale for the investigation being reported                                               | 1-3            |
| Objectives                | <a href="#">#3</a>  | State specific objectives, including any prespecified hypotheses                                                                   | 4              |
| <b>Methods</b>            |                     |                                                                                                                                    |                |
| Study design              | <a href="#">#4</a>  | Present key elements of study design early in the paper                                                                            | 4              |
| Setting                   | <a href="#">#5</a>  | Describe the setting, locations, and relevant dates, including periods of recruitment, exposure, follow-up,<br>and data collection | 4              |

|    |                      |                      |                                                                                                              |     |
|----|----------------------|----------------------|--------------------------------------------------------------------------------------------------------------|-----|
| 1  | Eligibility criteria | <a href="#">#6a</a>  | Give the eligibility criteria, and the sources and methods of selection of participants.                     | 5   |
| 2  |                      |                      |                                                                                                              |     |
| 3  |                      |                      |                                                                                                              |     |
| 4  |                      | <a href="#">#7</a>   | Clearly define all outcomes, exposures, predictors, potential confounders, and effect modifiers. Give        | 5-6 |
| 5  |                      |                      | diagnostic criteria, if applicable                                                                           |     |
| 6  |                      |                      |                                                                                                              |     |
| 7  |                      |                      |                                                                                                              |     |
| 8  | Data sources /       | <a href="#">#8</a>   | For each variable of interest give sources of data and details of methods of assessment (measurement).       | 6-7 |
| 9  |                      |                      |                                                                                                              |     |
| 10 | measurement          |                      | Describe comparability of assessment methods if there is more than one group. Give information separately    |     |
| 11 |                      |                      | for for exposed and unexposed groups if applicable.                                                          |     |
| 12 |                      |                      |                                                                                                              |     |
| 13 |                      |                      |                                                                                                              |     |
| 14 | Bias                 | <a href="#">#9</a>   | Describe any efforts to address potential sources of bias                                                    | 7   |
| 15 |                      |                      |                                                                                                              |     |
| 16 |                      |                      |                                                                                                              |     |
| 17 | Study size           | <a href="#">#10</a>  | Explain how the study size was arrived at                                                                    | 5   |
| 18 |                      |                      |                                                                                                              |     |
| 19 | Quantitative         | <a href="#">#11</a>  | Explain how quantitative variables were handled in the analyses. If applicable, describe which groupings     | 7-8 |
| 20 |                      |                      | variables                                                                                                    |     |
| 21 |                      |                      | were chosen, and why                                                                                         |     |
| 22 |                      |                      |                                                                                                              |     |
| 23 |                      |                      |                                                                                                              |     |
| 24 | Statistical methods  | <a href="#">#12a</a> | Describe all statistical methods, including those used to control for confounding                            | 7-8 |
| 25 |                      |                      |                                                                                                              |     |
| 26 |                      |                      |                                                                                                              |     |
| 27 | Statistical methods  | <a href="#">#12b</a> | Describe any methods used to examine subgroups and interactions                                              | 7-8 |
| 28 |                      |                      |                                                                                                              |     |
| 29 | Statistical methods  | <a href="#">#12c</a> | Explain how missing data were addressed                                                                      | 7-8 |
| 30 |                      |                      |                                                                                                              |     |
| 31 |                      |                      |                                                                                                              |     |
| 32 | Statistical methods  | <a href="#">#12d</a> | If applicable, describe analytical methods taking account of sampling strategy                               | 7-8 |
| 33 |                      |                      |                                                                                                              |     |
| 34 |                      |                      |                                                                                                              |     |
| 35 | Statistical methods  | <a href="#">#12e</a> | Describe any sensitivity analyses                                                                            | 7-8 |
| 36 |                      |                      |                                                                                                              |     |
| 37 | <b>Results</b>       |                      |                                                                                                              |     |
| 38 |                      |                      |                                                                                                              |     |
| 39 |                      |                      |                                                                                                              |     |
| 40 | Participants         | <a href="#">#13a</a> | Report numbers of individuals at each stage of study—eg numbers potentially eligible, examined for           | 9   |
| 41 |                      |                      | eligibility, confirmed eligible, included in the study, completing follow-up, and analysed. Give information |     |
| 42 |                      |                      | separately for for exposed and unexposed groups if applicable.                                               |     |
| 43 |                      |                      |                                                                                                              |     |
| 44 |                      |                      |                                                                                                              |     |
| 45 |                      |                      |                                                                                                              |     |
| 46 | Participants         | <a href="#">#13b</a> | Give reasons for non-participation at each stage                                                             | 9   |
| 47 |                      |                      |                                                                                                              |     |
| 48 |                      |                      |                                                                                                              |     |
| 49 | Participants         | <a href="#">#13c</a> | Consider use of a flow diagram                                                                               | 10  |
| 50 |                      |                      |                                                                                                              |     |
| 51 | Descriptive data     | <a href="#">#14a</a> | Give characteristics of study participants (eg demographic, clinical, social) and information on exposures   | 10  |
| 52 |                      |                      | and potential confounders. Give information separately for exposed and unexposed groups if applicable.       |     |
| 53 |                      |                      |                                                                                                              |     |
| 54 |                      |                      |                                                                                                              |     |
| 55 |                      |                      |                                                                                                              |     |
| 56 | Descriptive data     | <a href="#">#14b</a> | Indicate number of participants with missing data for each variable of interest                              | 10  |
| 57 |                      |                      |                                                                                                              |     |
| 58 |                      |                      |                                                                                                              |     |
| 59 |                      |                      |                                                                                                              |     |
| 60 |                      |                      |                                                                                                              |     |

|    |                   |                      |                                                                                                                    |       |
|----|-------------------|----------------------|--------------------------------------------------------------------------------------------------------------------|-------|
| 1  | Outcome data      | <a href="#">#15</a>  | Report numbers of outcome events or summary measures. Give information separately for exposed and                  | 10-12 |
| 2  |                   |                      | unexposed groups if applicable.                                                                                    |       |
| 3  |                   |                      |                                                                                                                    |       |
| 4  |                   |                      |                                                                                                                    |       |
| 5  | Main results      | <a href="#">#16a</a> | Give unadjusted estimates and, if applicable, confounder-adjusted estimates and their precision (eg, 95%           | 13-14 |
| 6  |                   |                      | confidence interval). Make clear which confounders were adjusted for and why they were included                    |       |
| 7  |                   |                      |                                                                                                                    |       |
| 8  |                   |                      |                                                                                                                    |       |
| 9  |                   |                      |                                                                                                                    |       |
| 10 | Main results      | <a href="#">#16b</a> | Report category boundaries when continuous variables were categorized                                              | 13-14 |
| 11 |                   |                      |                                                                                                                    |       |
| 12 | Main results      | <a href="#">#16c</a> | If relevant, consider translating estimates of relative risk into absolute risk for a meaningful time period       | 13-14 |
| 13 |                   |                      |                                                                                                                    |       |
| 14 |                   |                      |                                                                                                                    |       |
| 15 | Other analyses    | <a href="#">#17</a>  | Report other analyses done—e.g., analyses of subgroups and interactions, and sensitivity analyses                  | 13-14 |
| 16 |                   |                      |                                                                                                                    |       |
| 17 |                   |                      |                                                                                                                    |       |
| 18 | Discussion        |                      |                                                                                                                    |       |
| 19 |                   |                      |                                                                                                                    |       |
| 20 | Key results       | <a href="#">#18</a>  | Summarise key results with reference to study objectives                                                           | 13-14 |
| 21 |                   |                      |                                                                                                                    |       |
| 22 |                   |                      |                                                                                                                    |       |
| 23 | Limitations       | <a href="#">#19</a>  | Discuss limitations of the study, taking into account sources of potential bias or imprecision. Discuss both       | 17    |
| 24 |                   |                      | direction and magnitude of any potential bias.                                                                     |       |
| 25 |                   |                      |                                                                                                                    |       |
| 26 |                   |                      |                                                                                                                    |       |
| 27 | Interpretation    | <a href="#">#20</a>  | Give a cautious overall interpretation considering objectives, limitations, multiplicity of analyses, results from | 14-17 |
| 28 |                   |                      | similar studies, and other relevant evidence.                                                                      |       |
| 29 |                   |                      |                                                                                                                    |       |
| 30 |                   |                      |                                                                                                                    |       |
| 31 |                   |                      |                                                                                                                    |       |
| 32 | Generalisability  | <a href="#">#21</a>  | Discuss the generalisability (external validity) of the study results                                              | 17    |
| 33 |                   |                      |                                                                                                                    |       |
| 34 | Other Information |                      |                                                                                                                    |       |
| 35 |                   |                      |                                                                                                                    |       |
| 36 |                   |                      |                                                                                                                    |       |
| 37 | Funding           | <a href="#">#22</a>  | Give the source of funding and the role of the funders for the present study and, if applicable, for the original  | 18    |
| 38 |                   |                      | study on which the present article is based                                                                        |       |
| 39 |                   |                      |                                                                                                                    |       |
| 40 |                   |                      |                                                                                                                    |       |

41  
42 The STROBE checklist is distributed under the terms of the Creative Commons Attribution License CC-BY. This checklist was completed on 10. March  
43 2023 using <https://www.goodreports.org/>, a tool made by the [EQUATOR Network](#) in collaboration with [Penelope.ai](#)  
44  
45  
46  
47  
48  
49  
50  
51  
52  
53  
54  
55  
56  
57  
58  
59  
60

# BMJ Open

## Magnitude of occupational exposure to sharp injuries among Nurses working in South Gondar zone public hospitals, Northcentral Ethiopia: Institution-based cross-sectional study

|                                 |                                                                                                                                                                                                               |
|---------------------------------|---------------------------------------------------------------------------------------------------------------------------------------------------------------------------------------------------------------|
| Journal:                        | <i>BMJ Open</i>                                                                                                                                                                                               |
| Manuscript ID                   | bmjopen-2023-073595.R1                                                                                                                                                                                        |
| Article Type:                   | Original research                                                                                                                                                                                             |
| Date Submitted by the Author:   | 26-Jul-2023                                                                                                                                                                                                   |
| Complete List of Authors:       | Aytenew, Tigabu; Debre Tabor University, Department of Nursing<br>Kassie, Yohannes Tesfahun; Debre Tabor University<br>Kebede, Solomon; Debre Tabor University, Department of Pediatrics and Neonatal Nursing |
| <b>Primary Subject Heading</b>: | Occupational and environmental medicine                                                                                                                                                                       |
| Secondary Subject Heading:      | Infectious diseases                                                                                                                                                                                           |
| Keywords:                       | Risk management < HEALTH SERVICES ADMINISTRATION & MANAGEMENT, INFECTIOUS DISEASES, Infection control < INFECTIOUS DISEASES, Safety                                                                           |
|                                 |                                                                                                                                                                                                               |

SCHOLARONE™  
Manuscripts



I, the Submitting Author has the right to grant and does grant on behalf of all authors of the Work (as defined in the below author licence), an exclusive licence and/or a non-exclusive licence for contributions from authors who are: i) UK Crown employees; ii) where BMJ has agreed a CC-BY licence shall apply, and/or iii) in accordance with the terms applicable for US Federal Government officers or employees acting as part of their official duties; on a worldwide, perpetual, irrevocable, royalty-free basis to BMJ Publishing Group Ltd ("BMJ") its licensees and where the relevant Journal is co-owned by BMJ to the co-owners of the Journal, to publish the Work in this journal and any other BMJ products and to exploit all rights, as set out in our [licence](#).

The Submitting Author accepts and understands that any supply made under these terms is made by BMJ to the Submitting Author unless you are acting as an employee on behalf of your employer or a postgraduate student of an affiliated institution which is paying any applicable article publishing charge ("APC") for Open Access articles. Where the Submitting Author wishes to make the Work available on an Open Access basis (and intends to pay the relevant APC), the terms of reuse of such Open Access shall be governed by a Creative Commons licence – details of these licences and which [Creative Commons](#) licence will apply to this Work are set out in our licence referred to above.

Other than as permitted in any relevant BMJ Author's Self Archiving Policies, I confirm this Work has not been accepted for publication elsewhere, is not being considered for publication elsewhere and does not duplicate material already published. I confirm all authors consent to publication of this Work and authorise the granting of this licence.

1  
2  
3 1 **Magnitude of occupational exposure to sharp injuries among Nurses working in**  
4  
5 2 **South Gondar zone public hospitals, Northcentral Ethiopia: Institution-based**  
6  
7 3 **cross-sectional study**

8  
9  
10 4 Tigabu Munye Aytnew<sup>1\*</sup>, Yohannes Tesfahun Kassie<sup>2</sup>, Solomon Demis Kebede<sup>3</sup>

11  
12 5 <sup>1</sup>Department of Nursing, College of Health Sciences, Debre Tabor University, Debre  
13  
14 6 Tabor, Ethiopia

15  
16  
17 7 <sup>2</sup>College of Health Sciences, Debre Tabor University, Debre Tabor, Ethiopia

18  
19 8 <sup>3</sup>Department of Maternity and Neonatal Nursing, College of Health Sciences, Debre  
20  
21 9 Tabor University, Debre Tabor, Ethiopia

22  
23  
24 10 \*Corresponding author: Tigabu Munye Aytnew. *Tele: +251921613861 Fax:*

25  
26 11 0581410533, and

27  
28 12 *Email: [tigabumunye21@gmail.com](mailto:tigabumunye21@gmail.com)*

29  
30 13 YT: [tesfahunyohannes08@gmail.com](mailto:tesfahunyohannes08@gmail.com)

31  
32 14 SD: [solomondemis@gmail.com](mailto:solomondemis@gmail.com)

33  
34  
35 15 **ABSTRACT**

36  
37  
38 16 **Objective:** The study aimed to determine the magnitude of occupational exposure to  
39  
40 17 sharp injuries and identify its associated factors among nurses.

41  
42  
43 18 **Design:** Institution-based cross-sectional study design was conducted from November  
44  
45 19 01-30/2022.

46  
47  
48 20 **Analysis:** The collected data were entered into Epi-Data version 4.2; then, exported to  
49  
50 21 Stata version 14 for analysis. Variables with a p-value of <0.05 at 95% CI were  
51  
52 22 considered significantly associated with occupational exposure to sharp injuries.

53  
54 23 **Setting:** The study was conducted in South Gondar zone public hospitals.



24 **Participants:** Nurses working in South Gondar zone public hospitals.

25 **Results:** Of the total respondents, 213 (56.65%) were between the age of 25-34 with  
26 the mean  $\pm$  SD of age  $30.22 \pm 6.63$  years. Similarly, 202 (53.72%) of the respondents  
27 were females. This study finding showed that the magnitude of occupational exposure  
28 to sharp injuries among nurses was 52.39% (95%CI: 47.92%, 56.37%). Moreover, this  
29 study finding showed that year of service  $>10$  years (AOR=2.35, 95%CI: 1.21,4.57),  
30 lack of infection prevention training (AOR=1.85, 95%CI: 1.09, 3.45), job-related stress  
31 (AOR=2.24, 95%CI: 1.27, 3.89) and presence of contaminated sharps at workplace  
32 (AOR=2.76, 95%CI: 1.67, 4.72) were significantly associated with occupational  
33 exposure to sharp injuries among nurses.

34 **Conclusions:** Generally, this study finding reported that the magnitude of occupational  
35 exposure to sharp injuries among nurses was high. This study finding also showed that  
36 years of service  $>10$  years, lack of infection prevention training, job-related stress and  
37 the presence of contaminated sharps at workplace were independent predictors of  
38 occupational exposure to sharp injuries among nurses. Hence, all the concerned bodies  
39 should strengthen regular provision of infection prevention training to nurses at all  
40 levels. Nurses should practice proper use of safety box more than ever in order to avoid  
41 the presence of contaminated needles and other sharp materials at workplace.

42 **Keywords:** Occupational exposure to sharp injuries, Nurses, Public hospitals.

### 43 **Strengths and limitations of this study**

- 44 ◆ The findings could be strong evidence as a result of using census method.
- 45 ◆ The study might be subjected to recall and social desirability biases.
- 46 ◆ The study also might not show cause and effect relationships.

## 47 BACKGROUND

48 A sharp injury is "an accidental penetrating wound with an instrument that is potentially  
49 contaminated with the body fluid of another person" [1-10]. Sharp injuries occur when  
50 health care providers perform their clinical activities in the health care facilities, such as  
51 hospitals, health centers and clinics [3]. The majority of sharp injuries occur during  
52 administering injections, securing IV lines, drawing blood, checking blood sugar,  
53 recapping needles, poor handling and disposing of needles, and transferring blood or  
54 body fluids from a syringe to a specimen container [3, 4].

55 Globally, of the total of 35 million health care providers, it is estimated that 3 million  
56 experience sharp injuries every year; of these, nurses are at the greatest risk, with up to  
57 50% of all sharp injuries being sustained by nurses [11, 12]. Because nurses have the  
58 highest rate of encountering sharp injuries among health care providers due to their  
59 prolonged exposure to needles and other sharp devices [13]. Most of these sharp  
60 injuries (90%) occur in developing countries, where the burden of blood borne infections  
61 in the general population is high and access to safety devices and personal protective  
62 equipments (PPEs) is limited, specifically more common in sub-Saharan African  
63 countries [14].

64 On average, health care providers in Africa suffer 2 to 4 sharp injuries every year [15].

65 In Sub-Saharan Africa, the magnitude of sharp injuries and their associated factors are  
66 not clearly understood among health care providers [16]. A study conducted in Jimma  
67 University Specialized Teaching Hospital (JUSTH), Ethiopia reported that the magnitude  
68 of occupational exposure to sharp injuries among nurses was 61.76% [3]. Sharp injuries  
69 are markedly the most common and preventable occupational hazards that health care

1  
2  
3 70 providers are exposed to and become high risk for the transmission of a variety of blood  
4  
5 71 borne infections, such as hepatitis B virus (HBV), hepatitis C virus (HCV) and human  
6  
7 72 immunodeficiency virus (AIDS) [17, 18].  
8  
9

10 73 Blood-borne infections following sharp injuries have serious consequences, including  
11  
12 74 long-term illness, psychological stress to the victims ,colleagues and family, disability  
13  
14  
15 75 and death [19]. In addition to the potential risks for infectious diseases, they also suffer  
16  
17 76 for direct costs required for laboratory tests, including tests for HIV antibodies, hepatitis  
18  
19 77 B serology and a baseline test for hepatitis C as well as any treatments for these  
20  
21 78 infections [20]. The implementation of education, universal precautions, elimination of  
22  
23 79 needle recapping, and use of sharp containers for safe disposal have reduced the  
24  
25 80 chance of getting sharp injuries by 80% [6, 21].  
26  
27  
28

29 81 Health care providers who followed universal precautions were 66% less likely to have  
30  
31 82 needle sticks and sharp injuries than those who did not follow [22]. Training of handling  
32  
33 83 objects, using instruments to grasp needles, reduction of the use of sharp devices,  
34  
35 84 avoiding hand-to-hand passing of sharp instruments, decreasing of direct contact with  
36  
37 85 needles, an appropriate disposal and using safety boxes properly can decrease the risk  
38  
39 86 of getting sharp injuries [23].  
40  
41  
42

43 87 In Ethiopia, where primary health care services are covered by nurses, it is important to  
44  
45 88 develop their knowledge and practice on universal precautions since the risks of getting  
46  
47 89 infections following sharp injuries are high in their day to day activities [4]. However,  
48  
49 90 there is limited information in the study area that describes the magnitude of sharp  
50  
51 91 injuries and its predictors among nurses. Therefore, this study aimed to determine the  
52  
53 92 magnitude of occupational exposure to sharp injuries and identify its associated factors.  
54  
55  
56  
57  
58  
59  
60

## 93 **General objective**

94 To assess the magnitude of occupational exposure to sharp injuries among nurses  
95 working in South Gondar zone public hospitals, Northcentral Ethiopia from November  
96 01-30, 2022

## 97 **Specific objectives**

98 To determine the magnitude of occupational exposure to sharp injuries among nurses  
99 working in South Gondar zone public hospitals, Northcentral Ethiopia from November  
100 01-30, 2022.

101 To identify the predictors of occupational exposure to sharp injuries among nurses  
102 working in South Gondar zone public hospitals, Northcentral Ethiopia from November  
103 01-30, 2022.

## 104 **METHODS**

### 105 **Study design, area and Period**

106 Institution-based cross-sectional study design was conducted among nurses working in  
107 South Gondar zone public hospitals from November 01-30, 2022. South Gondar is one  
108 of the zonal administrations in Amhara region, Northern Ethiopia with an estimated area  
109 of 14,095.19 square kilometers. It is located by South and North Wollo zones in the  
110 East, Bahirdar Liyu zone and Lake Tana in the West, Central Gondar in the North,  
111 Waghimra zone in the Northeast and East and West Gojjam zones in the South (Figure  
112 1). There are ten public hospitals in the zone, namely Debre Tabor comprehensive  
113 specialized hospital, Addis Zemen, Ebnat, Mekane-Eyesus, Andabet, Wogeda, Woreta,  
114 Nefas Mewucha, Dr. Ambachew Makonnen and Migbaru Kebede primary hospitals.

### 115 **Source Population**

1  
2  
3 116 All nurses working in all South Gondar zone public hospitals.  
4

5  
6 117 **Study Population**  
7

8 118 All nurses working in all South Gondar zone public hospitals.  
9

10  
11 119 **Inclusion and exclusion criteria**  
12

13 120 All nurses working in all South Gondar zone public hospitals at the time of the data  
14  
15 121 collection period were included in the study; whereas nurses who were on sick leave,  
16  
17 122 maternity leave, annual leave, and training at the time of data collection period were  
18  
19 123 excluded from the study.  
20  
21

22 124 **Patient and public involvement**  
23

24  
25 125 None  
26

27 126 **Sample size determination**  
28

29  
30 127 The sample size (n) was calculated by Computer-based Epi info7 software using a  
31  
32 128 single population proportion at 95% CI, with a 5% margin of error, and by assuming the  
33  
34 129 burden of occupational exposure to sharp injuries among nurses to be 61.76% [3].  
35

$$n = \frac{(Z_{\alpha/2})^2 P (1-P)}{d^2}$$

36  
37 130  
38  
39 131  
40 132 *Where:* - n= the minimum sample size required for the study

41  
42 133 Z= standard normal distribution (Z=1.96) with a 95% confidence interval

43  
44 134 P= burden of occupational exposure to sharp injuries among nurses

45  
46 135 (61.76%=0.6176)

47  
48 136 d= is a tolerable margin of error (d=5%=0.05)

$$n = \frac{(1.96)^2 0.6176(1-0.6176)}{(0.05)^2}$$

49  
50  
51 137  
52  
53  
54 138  
55  
56  
57  
58  
59  
60

1  
2  
3 139 n=363. Then, by adding a 10% (0.1) non-response rate, the final sample size  
4  
5 140 (n) was calculated to be 400. But, since it was the minimum sample size required, and  
6  
7 141 the source population was only 402, the source population (402) was taken as a sample  
8  
9  
10 142 size for this study (census method was used).

## 11 12 143 **Dependent Variable**

13  
14  
15 144 Occupational exposure to sharp injuries

## 16 17 145 **Independent variables**

18  
19  
20 146 Socio-demographic characteristics: Age, sex, marital status, level of education and  
21  
22 147 years of service.

23  
24  
25 148 Behavioral characteristics: Sleeping disturbance, following of standard precaution guide  
26  
27 149 line, use of PPE, knowledge of standard precautions and job-related stress.

28  
29 150 Work environment characteristics: Length of stay/shift, health and safety information  
30  
31 151 access, infection prevention training, work load, availability of safety box, availability of  
32  
33 152 standard precaution guidelines and presence of contaminated sharps.

## 34 35 153 **Operational Definitions**

36  
37  
38  
39 154 **Occupational exposure to sharp injuries:** Any kind of needle stick and/or other sharp  
40  
41 155 injury which occurred among nurses in relation to his/her job in the health care facility  
42  
43 156 [4].

44  
45  
46 157 **Knowledge:** Nurses who have scored  $\geq 75\%$  (9) of 12 knowledge-related questions  
47  
48 158 were considered to have adequate knowledge; whereas nurses who have scored below  
49  
50 159 75% were also considered to have inadequate knowledge towards sharp injuries [24].

51  
52  
53 160 **Job-related stress:** Nurses who scored above or equal to the mean score (32.78) of  
54  
55 161 the Likert-scale questions that used to assess nurses' job-related stress were

1  
2  
3 162 considered they have a job-related stress, whereas nurses who scored below the mean  
4  
5 163 score were also considered they didn't have job-related stress [25].  
6

7  
8 164 **Workload:** When one trained intensive care unit (ICU) nurse provides nursing care  
9  
10 165 services for more than two patients in the ICU, and when one nurse provides nursing  
11  
12 166 care services for more than 6 patients in inpatient departments per shift [25].  
13

14  
15 167 **Sleeping disturbance:** The presence of sleeping problems while the health care  
16  
17 168 provider is at workplace [25].  
18

### 19 169 **Data collection tool and procedure**

20  
21  
22 170 A structured and pre-tested self-administered English version questionnaire was used to  
23  
24 171 collect the data. The questionnaire was prepared by reviewing different literatures [3, 4,  
25  
26 172 25], and using standardized Expanded Nursing Stress Scale (ENSS) Likert-scale  
27  
28 173 questions to assess job-related stress of the respondents [3, 4, 25].  
29

30  
31 174 The questionnaire contains nurses' socio-demographic, behavioral, environmental  
32  
33 175 characteristics, knowledge questions related to standard precaution and standardized  
34  
35 176 Likert-scale questions to assess job-related stress of the respondents. Reliability of the  
36  
37 177 tool was established with an overall Cronbach's alpha score (0.74 for knowledge  
38  
39 178 questions related to standard precaution, and 0.79 for job-related stress Likert-scale  
40  
41 179 questions). Training was given to the data collectors, and before giving the  
42  
43 180 questionnaire, the data collectors informed the nurses about the aims/purposes, risks  
44  
45 181 and possible benefits of the study, the right and refusal to participate in the study, and  
46  
47 182 that the collected information would be kept confidential.  
48  
49  
50  
51  
52  
53  
54  
55  
56  
57  
58  
59  
60

1  
2  
3 183 After all, those nurses who were willing and have signed the informed voluntary consent  
4  
5 184 form were requested to fill out the questionnaire. The data collection was held for four  
6  
7  
8 185 consecutive weeks (from November 01-30/2022).  
9

## 10 186 **Data quality control**

11  
12 187 Five percent of the questionnaire was pre-tested from October 23-27/2022 in Koladiba  
13  
14  
15 188 primary hospital to assess the reliability, clarity, consistency, understandability and the  
16  
17 189 total time that it would take to complete the questionnaire prior to the actual data  
18  
19  
20 190 collection. Then, the necessary comments and feedback were incorporated in the final  
21  
22 191 tool to improve its quality. Training was given for the data collectors regarding the  
23  
24 192 objective of the study, data collection tool, ways of data collection, checking the  
25  
26 193 completeness of the collected data, and how to maintain confidentiality.

27  
28  
29 194 The collected data were checked for completeness, cleaned, edited, coded manually,  
30  
31 195 and entered into Epi data version 4.2. Double data entry was done for its validity, and  
32  
33 196 compared to the original data. Outliers were checked, and simple frequencies and cross  
34  
35  
36 197 tabulation were done for missing values and variables.  
37

## 38 198 **Data processing and analysis**

39  
40  
41 199 Then after, the data were exported to Stata version 14 for analysis. Descriptive analysis  
42  
43 200 was done by computing proportions and summary statistics. The information was  
44  
45 201 presented using simple frequencies, summary measures, tables, and figures. Binary  
46  
47  
48 202 logistic regression was used to identify the associated factors of occupational exposure  
49  
50 203 to sharp injuries. Bivariate and multivariate analyses were used to see the association  
51  
52 204 between the outcome variable, and each independent variable. The assumptions for  
53  
54  
55  
56  
57  
58  
59  
60



205 binary logistic regression were checked. The goodness of fit was tested by Hosmer-  
 206 Lemeshow statistics and Omnibus tests.

207 All variables with  $P < 0.2$  in the bivariate analysis were included in the final multivariable  
 208 analysis model in order to control all the possible confounders, and the variables were  
 209 selected using enter method. The adjusted odds ratio (AOR) along with a 95% CI was  
 210 estimated to identify the associated factors of occupational exposure to sharp injuries.  
 211 In this study, variables with a P-value of  $< 0.05$  were considered significantly associated  
 212 with occupational exposure to sharp injuries.

## 213 RESULTS

214 Of the total of 402 respondents, 376 were included in the final analysis, giving a  
 215 response rate of 93.53%.

### 216 Socio-demographic and working environment related attributes

217 Of the total respondents, 213 (56.65%) were between the age of 25-34 with the mean  $\pm$   
 218 SD of age  $30.22 \pm 6.63$  years. Similarly, 202 (53.72%) of the respondents were females.  
 219 Additionally, only 89 (23.67%) of the respondents got infection prevention training.  
 220 Moreover, 271 (72.07%) of them had safety boxes at workplace to dispose needles and  
 221 other sharp materials after use, and 214 (56.91%) of respondents also stated that there  
 222 were contaminated needles and sharp materials at workplace (Table 1).

225 Table 1: Socio-demographic characteristics of the respondents working in South  
 226 Gondar zone public hospitals, Northcentral Ethiopia, 2022 (n=376).

| Variables | Category | Frequency | Percentage (%) |
|-----------|----------|-----------|----------------|
|-----------|----------|-----------|----------------|

1  
2  
3  
4  
5  
6  
7  
8  
9  
10  
11  
12  
13  
14  
15  
16  
17  
18  
19  
20  
21  
22  
23  
24  
25  
26  
27  
28  
29  
30  
31  
32  
33  
34  
35  
36  
37  
38  
39  
40  
41  
42  
43  
44  
45  
46  
47  
48  
49  
50  
51  
52  
53  
54  
55  
56  
57  
58  
59  
60

|                                      |                  |     |       |
|--------------------------------------|------------------|-----|-------|
| Age                                  | ≤24              | 68  | 18.09 |
|                                      | 25-34            | 213 | 56.65 |
|                                      | 35-44            | 71  | 18.88 |
|                                      | ≥45              | 24  | 6.38  |
| Sex                                  | Male             | 174 | 46.28 |
|                                      | Female           | 202 | 53.72 |
| Marital status                       | Single           | 171 | 45.48 |
|                                      | Married          | 183 | 48.67 |
|                                      | Divorced         | 17  | 4.52  |
|                                      | Widowed          | 5   | 1.33  |
| Educational level                    | Diploma          | 132 | 35.11 |
|                                      | BSc              | 244 | 64.89 |
| Years of service                     | <5               | 136 | 36.17 |
|                                      | 5-10             | 128 | 34.04 |
|                                      | >10              | 112 | 29.79 |
| Sleeping disturbance problem         | Yes              | 274 | 72.87 |
|                                      | No               | 102 | 27.13 |
| Use of PPEs                          | All of the time  | 185 | 49.20 |
|                                      | Most of the time | 102 | 27.13 |
|                                      | Sometimes        | 73  | 19.41 |
|                                      | Never use        | 16  | 4.26  |
| Workload in the unit                 | Yes              | 212 | 56.38 |
|                                      | No               | 164 | 43.62 |
| Length of stay/shift at work         | ≤8 hours         | 193 | 51.33 |
|                                      | 9-14 hours       | 35  | 9.31  |
|                                      | ≥15 hours        | 148 | 39.36 |
| Health and safety information access | Yes              | 291 | 77.39 |
|                                      | No               | 85  | 22.61 |
| Training on IP                       | Yes              | 89  | 23.67 |
|                                      | No               | 287 | 76.33 |

|                                              |                      |     |       |
|----------------------------------------------|----------------------|-----|-------|
| Availab. of safety box at workplace          | Yes                  | 271 | 72.07 |
|                                              | No                   | 105 | 27.93 |
| Availab. of universal precaution guide line  | Yes                  | 212 | 56.38 |
|                                              | No                   | 164 | 43.62 |
| Following universal precaution guide line    | Yes                  | 93  | 43.87 |
|                                              | No                   | 119 | 56.13 |
| Presence of contaminated sharps at workplace | Yes                  | 214 | 56.91 |
|                                              | No                   | 162 | 43.09 |
| Knowledge of standard precaution             | Adequate knowledge   | 134 | 35.64 |
|                                              | Inadequate knowledge | 242 | 64.36 |
| Job-related stress                           | Stressed             | 237 | 63.03 |
|                                              | Not stressed         | 139 | 36.97 |

227 \*BSc, Bachelor of Science; \*IP, infection prevention; PPEs, personal protective  
228 equipments

### 229 **Magnitude of occupational exposure to sharp injuries**

230 This study finding showed that the magnitude of occupational exposure to sharp injuries  
231 among nurses was 52.39% (95%CI: 47.92%, 56.37%) (197).

232 The occurrence of occupational exposure to sharp injuries was the highest among  
233 respondents with the age of 45 years and above (62.50). Likewise, the majority of  
234 males, 108(62.07) also got occupational exposure to sharp injuries. Occupational  
235 exposure to sharp injuries was also the highest among diploma nurses, and nurses  
236 having more than 10 years of service (59.85% and 62.50%) respectively. Moreover, the  
237 occurrence of sharp injuries was also the highest among nurses working along with the  
238 presence of contaminated sharps at workplace (63.55%) (Table 2).

239 Table 2: Distribution of sharp injuries among nurses working in South Gondar zone  
240 public hospitals, Northcentral Ethiopia, 2022 (n=376).

| Variables | Categories | Occupational exposure to sharp injuries |
|-----------|------------|-----------------------------------------|
|-----------|------------|-----------------------------------------|

|                                    |                  | Yes (%)    | No (%)     |
|------------------------------------|------------------|------------|------------|
| Age                                | ≤24              | 32(47.06)  | 36(52.94)  |
|                                    | 25-34            | 111(52.11) | 102(47.89) |
|                                    | 35-44            | 39(54.93)  | 32(45.07)  |
|                                    | ≥45              | 15(62.50)  | 9(37.50)   |
| Sex                                | Male             | 108(62.07) | 66(37.93)  |
|                                    | Female           | 89(44.06)  | 113(55.94) |
| Marital status                     | Single           | 87(50.88)  | 84(49.12)  |
|                                    | Married          | 96(52.46)  | 87(47.54)  |
|                                    | Divorced         | 11(64.71)  | 6(32.29)   |
|                                    | Widowed          | 3(60.0)    | 2(40.0)    |
| Educational level                  | Diploma          | 79(59.85)  | 53(40.15)  |
|                                    | BSc              | 118(48.36) | 126(51.64) |
| Year of service                    | <5               | 59(43.38)  | 77(56.62)  |
|                                    | 5-10             | 68(53.13)  | 60(46.87)  |
|                                    | >10              | 70(62.50)  | 42(37.50)  |
| Sleeping disturbance problem       | Yes              | 141(51.46) | 133(48.54) |
|                                    | No               | 56(54.90)  | 46(45.10)  |
| Use of PPEs                        | All of the time  | 89(48.11)  | 96(51.89)  |
|                                    | Most of the time | 56(54.90)  | 46(45.10)  |
|                                    | Sometimes        | 41(56.16)  | 32(43.84)  |
|                                    | Never use        | 11(58.75)  | 5(31.25)   |
| Workload                           | Yes              | 125(58.96) | 87(41.04)  |
|                                    | No               | 72(43.90)  | 92(56.10)  |
| Length of stay/shift at work       | ≤8 hours         | 95(49.22)  | 98(50.78)  |
|                                    | 9-14 hours       | 19(54.29)  | 16(45.71)  |
|                                    | ≥15 hours        | 83(56.08)  | 65(43.92)  |
| Health & safety information access | Yes              | 148(50.86) | 143(49.14) |
|                                    | No               | 49(57.65)  | 36(42.35)  |
| Training on IP                     | Yes              | 38(42.70)  | 51(57.30)  |
|                                    | No               | 159(55.40) | 128(44.60) |

|                                              |                      |             |             |
|----------------------------------------------|----------------------|-------------|-------------|
| Availab. of safety box                       | Yes                  | 129(47.60)  | 142(52.40)  |
|                                              | No                   | 68(64.76)   | 37(35.24)   |
| Availab. of universal precaution guide line  | Yes                  | 99(46.70)   | 113(53.30)  |
|                                              | No                   | 98(59.76)   | 66(40.24)   |
| Following universal precaution guide line    | Yes                  | 42 (45.16)  | 51(54.84)   |
|                                              | No                   | 155 (54.77) | 128 (45.23) |
| Presence of contaminated sharps at workplace | Yes                  | 136(63.55)  | 78(36.45)   |
|                                              | No                   | 61(37.65)   | 101(62.35)  |
| Knowledge of standard precaution             | Adequate knowledge   | 59(44.03)   | 75(55.97)   |
|                                              | Inadequate knowledge | 138(57.02)  | 104(42.98)  |
| Job-related stress                           | Stressed             | 149(62.87)  | 88(37.13)   |
|                                              | Not stressed         | 48(34.53)   | 91(65.47)   |

241 \*BSc, Bachelor of Science; PPEs, personal protective equipments; and IP, infection  
242 prevention

### 243 Occupational exposure to sharp injuries related Attributes

244 Of the respondents who encountered occupational exposure to sharp injuries,  
245 114(57.87%) had encountered sharp injuries 1-2 times. Additionally, 69 (35.03%) of  
246 injuries occurred during abrupt movement of patients, and 86(43.65%) sharp injuries  
247 were slight skin penetration. Moreover, 93 (47.21%) of injuries were from the unknown  
248 status, and only 92 (46.70%) sharp injuries were reported to the concerned body (Table  
249 3).

250 Table 3: Occupational exposure to sharp injuries related attributes among nurses  
251 working in South Gondar zone public hospitals, Northcentral Ethiopia, 2022 (n=376).

| Variables                      | Values               | Frequency | Percentage (%) |
|--------------------------------|----------------------|-----------|----------------|
| Frequency of injuries occurred | 1-2 times            | 114       | 57.87          |
|                                | 3-4 times            | 71        | 36.04          |
|                                | ≥5 times             | 12        | 6.09           |
| Condition of sharps            | Dirty needles/sharps | 74        | 37.56          |

|                                      |                                          |     |       |
|--------------------------------------|------------------------------------------|-----|-------|
|                                      | Sterile needles/sharps                   | 58  | 29.45 |
|                                      | Both dirty & sterile needles/sharps      | 65  | 32.99 |
| How sustaining injuries              | During abrupt movement of patients       | 69  | 35.03 |
|                                      | During recapping needle after use        | 63  | 31.98 |
|                                      | During sharp collection                  | 46  | 23.35 |
|                                      | Others                                   | 19  | 9.64  |
| Type of injuries sustained           | Deep injury                              | 54  | 27.41 |
|                                      | Slight skin penetration                  | 86  | 43.65 |
|                                      | Superficial injury                       | 57  | 28.94 |
| Health status of the source patients | Known HIV/AIDS positive                  | 37  | 18.78 |
|                                      | Clinically suspected HIV/AIDS            | 40  | 20.30 |
|                                      | Clinically diagnosed hepatitis B patient | 27  | 13.17 |
|                                      | Unknown status                           | 93  | 47.21 |
| Report of the injuries               | Yes                                      | 92  | 46.70 |
|                                      | No                                       | 105 | 53.30 |

252 \*HIV/AIDS, Human immune deficiency virus/Acquired immune deficiency syndrome

### 253 **Distribution of sharp injuries by their type**

254 The types of sharps that cause injuries to nurses were intravenous needles,  
 255 64(32.49%), intramuscular needles, 42(21.32%), suturing needles, 36(18.27%), lancets,  
 256 29 (14.72%), surgical blades, 17 (8.63%) and scalpels, 9 (4.57%).

### 257 **Factors associated with occupational exposure to sharp injuries**

258 Nurses having above 10 years of service were 2.35 times more likely to encounter  
 259 occupational exposure to sharp injuries than nurses having less than 5 years of service  
 260 (AOR=2.35, 95%CI: 1.21,4.57). On the other hand, nurses who didn't get infection  
 261 prevention training were 1.85 times more likely to encounter occupational exposure to

262 sharp injuries (AOR=1.85, 95%CI: 1.09, 3.45). Additionally, nurses having job-related  
 263 stress were also 2.24 times more likely to be exposed for sharp injuries (AOR=2.24,  
 264 95%CI: 1.27, 3.89), and nurses who were working in the area with the presence of  
 265 contaminated sharps were 2.76 times more likely to get the chance of occupational  
 266 exposure to sharp injuries (AOR=2.76, 95%CI: 1.67, 4.72) (Table 4).

267 Table 4: Showing the association between independent variables with occupational  
 268 exposure to sharp injuries among nurses working in South Gondar zone public  
 269 hospitals, Northcentral Ethiopia, 2022 (n=376).

| Variables                                | Categories           | Sharp injuries |             | COR (95%CI)       | AOR (95%CI)           |
|------------------------------------------|----------------------|----------------|-------------|-------------------|-----------------------|
|                                          |                      | Yes (%)        | No (%)      |                   |                       |
| Sex                                      | Male                 | 108 (54.82)    | 66 (36.87)  | 2.15 (1.32,3.07)  | 1.98 (0.91,4.21)      |
|                                          | Female               | 89 (45.18)     | 113 (63.13) | 1.00              | 1.00                  |
| Year of service                          | <5                   | 59 (29.95)     | 77 (43.02)  | 1.00              | 1.00                  |
|                                          | 5-10                 | 68 (34.52)     | 60 (33.52)  | 1.46 (0.87,2.42)  | 1.38 (0.72,2.64)      |
|                                          | >10                  | 70 (35.53)     | 42 (23.46)  | 2.12 (1.26,3.49)  | 2.35 (1.21,4.57) ***  |
| Workload in the unit                     | Yes                  | 125 (63.45)    | 87 (48.60)  | 1.73 (1.15,2.52)  | 1.42 (0.83,2.45)      |
|                                          | No                   | 72 (36.55)     | 92 (51.40)  | 1.00              | 1.00                  |
| Training                                 | Yes                  | 38 (19.29)     | 51 (28.49)  | 1.00              | 1.00                  |
|                                          | No                   | 159 (80.71)    | 128 (71.51) | 2.08 (1.49, 3.13) | 1.85(1.09, 3.45) **** |
| Nurses' knowledge of standard precaution | Adequate knowledge   | 59 (29.95)     | 75 (41.90)  | 1.00              | 1.00                  |
|                                          | Inadequate knowledge | 138 (70.05)    | 104 (58.10) | 1.96 (1.31,2.94)  | 1.42 (0.79,2.39)      |
| Nurses' job stress level                 | Stressed             | 149 (75.63)    | 88 (49.16)  | 2.45 (1.62,3.67)  | 2.24 (1.27,3.89) **   |
|                                          | Not stressed         | 48 (24.37)     | 91 (50.84)  | 1.00              | 1.00                  |
| Presence of contaminated sharps          | Yes                  | 136 (69.04)    | 78 (43.58)  | 2.71 (1.79,4.09)  | 2.76 (1.67,4.72) *    |
|                                          | No                   | 61 (30.96)     | 101 (56.42) | 1.00              | 1.00                  |

270 \*Significant at P=0.000, \*\*Significant at P=0.005, \*\*\*Significant at P=0.011, and

271 \*\*\*\*Significant at P=0.018.

## 272 DISCUSSION

1  
2  
3 273 This study finding showed that the magnitude of occupational exposure to sharp injuries  
4  
5 274 among nurses was 52.39%. This study finding also reported that years of service >10  
6  
7  
8 275 years, lack of infection prevention training, job-related stress, and the presence of  
9  
10 276 contaminated sharps at workplace were significantly associated with the occurrence of  
11  
12 277 occupational exposure to sharp injuries among nurses.

14  
15 278 In this study, the magnitude of occupational exposure to sharp injuries among nurses  
16  
17 279 was 52.39%. This finding was higher than a study conducted in three hospitals, Izmir,  
18  
19 280 Turkey (44.3%) [18], but lower than studies conducted in Public Sector Tertiary Care  
20  
21 281 Hospitals of Pakistan (67%) [26], and JUSH, Southwest Ethiopia (61.76%) [3]. This  
22  
23 282 variation might be due to the difference in study setting and period, as well as due to the  
24  
25 283 difference in infection prevention training and knowledge level of the respondents  
26  
27 284 towards standard precaution across study settings.

28  
29  
30  
31 285 In this study, year of service >10 years was significantly associated with the occurrence  
32  
33 286 of occupational exposure to sharp injuries among nurses at  $p < 0.05$ . This finding was  
34  
35 287 similar with studies conducted in three hospitals, Izmir, Turkey [18], and a secondary  
36  
37 288 care hospital, Gaza Strip [27], which showed that year of service had shown significant  
38  
39 289 association with the occurrence of occupational exposure to sharp injuries among  
40  
41 290 nurses at  $p < 0.05$ . It might be due to the fact that as year of service increases, the  
42  
43 291 chance of getting occupational exposure to sharp injuries also increases.

44  
45  
46  
47 292 This study finding also indicated that nurses who didn't get infection prevention training  
48  
49 293 were 1.85 times more likely to get the chance of occupational exposure to sharp injuries  
50  
51 294 compared to nurses who got the training. This finding was in line with a study  
52  
53 295 conducted in public hospitals of Jimma Zone, South West Ethiopia [4], which showed



1  
2  
3 296 that nurses who didn't get infection prevention training were 8.33 times more likely to  
4  
5 297 get the chance of occupational exposure to sharp injuries compared to nurses who got  
6  
7 298 the training. It is due to the fact that getting infection prevention training helps to  
8  
9 299 understand and practice the standard precaution guide line easily, which in turn reduces  
10  
11 300 the chance of getting occupational exposure to sharp injuries.

12  
13  
14 301 Similarly, this study finding also showed that job-related stress was significantly  
15  
16 302 associated with the occurrence of occupational exposure to sharp injuries among  
17  
18 303 nurses. This finding was comparable with a study conducted in JUSH, Southwest  
19  
20 304 Ethiopia which reported that job-related stress had shown significant association with  
21  
22 305 the occurrence of occupational exposure to sharp injuries among nurses [14]. It could  
23  
24 306 be explained that job-related stress might make nurses to lose their concentration and  
25  
26 307 practice their daily activities unsafely.

27  
28  
29 308 Moreover, this study finding also showed that the presence of contaminated needles  
30  
31 309 and sharp materials at workplace was also significantly associated with the occurrence  
32  
33 310 of occupational exposure to sharp injuries among nurses at  $P < 0.05$ . This finding was  
34  
35 311 congruent with a study conducted in JUSH, Southwest Ethiopia which reported that the  
36  
37 312 presence of contaminated needles and sharp materials at the workplace was  
38  
39 313 significantly associated with the occurrence of occupational exposure to sharp injuries  
40  
41 314 among nurses at  $p < 0.05$  [3]. The presence of contaminated needles and sharp  
42  
43 315 materials at workplace increases the chance of getting occupational exposure to sharp  
44  
45 316 injuries among nurses in their day-to-day workplace activities.

## 317 **Strengths and limitations of this study**

318  
319  
320  
321  
322  
323  
324  
325  
326  
327  
328  
329  
330  
331  
332  
333  
334  
335  
336  
337  
338  
339  
340  
341  
342  
343  
344  
345  
346  
347  
348  
349  
350  
351  
352  
353  
354  
355  
356  
357  
358  
359  
360

1  
2  
3 318 The study used census method, as a result, the findings could be strong evidence for  
4  
5 319 the problem. However, the study might be subjected to recall and social desirability  
6  
7 320 biases. The study also might not show cause and effect relationships while the study  
8  
9 321 design was cross sectional.  
10

## 11 322 **CONCLUSIONS**

12  
13  
14  
15 323 Generally, this study finding reported that the magnitude of occupational exposure to  
16  
17 324 sharp injuries among nurses was high. Moreover, this study finding also showed that  
18  
19 325 years of service >10 years, lack of infection prevention training, job-related stress, and  
20  
21 326 the presence of contaminated sharps at workplace were independent predictors of  
22  
23 327 occupational exposure to sharp injuries among nurses.  
24  
25

## 26 328 **Prevention and control strategies**

27  
28  
29 329 Continually educate the health care team: To achieve the desired infection prevention  
30  
31 330 and control goals, training on infection prevention and control should be given to the  
32  
33 331 staff on a continual basis covering the standard infection prevention and control  
34  
35 332 precautions.  
36  
37

38 333 Conducting regular clinical audits: It used to ensure best practice of the standard  
39  
40 334 infection prevention and control precautions such as proper use of personal protective  
41  
42 335 equipments, disposal of used needles and other sharps and hand hygiene.  
43  
44

45 336 Creating a cleanliness culture: By building a clean culture, staff are aware of the  
46  
47 337 benefits of infection prevention and control.  
48  
49

## 50 338 **Recommendations**

51  
52 339 All the concerned bodies should strengthen regular provision of infection prevention  
53  
54 340 training to the nurses at all levels. Stakeholders, including nursing staffs should also  
55  
56  
57

1  
2  
3 341 strengthen their efforts to work together to identify and manage the possible job-related  
4  
5 342 stressors among nurses. Furthermore, safety boxes should be available in each working  
6  
7  
8 343 unit, and nurses should also practice proper use of safety box more than ever in order  
9  
10 344 to avoid the presence of contaminated needles and other sharp materials at workplace.

## 11 345 **Abbreviations and acronyms**

12  
13  
14  
15 346 AIDS: Acquired Immune Deficiency Syndrome

16  
17 347 AOR: Adjusted Odds Ratio

18  
19 348 CI: Confidence Interval

20  
21 349 EBN: European Biosafety Network

22  
23 350 ENSS: Expanded Nursing Stress Scale

24  
25 351 HBV: Hepatitis B Virus

26  
27 352 HCV: Hepatitis C Virus

28  
29 353 HIV: Human Immune deficiency Virus

30  
31 354 ICU: Intensive Care Unit

32  
33 355 PPEs: Personal Protective Equipments

## 34 356 **Consent for Publication**

35  
36 357 Not applicable.

## 37 358 **Funding**

38  
39 359 Not applicable.

## 40 360 **Data availability**

41  
42 361 All data used for the study were included in the manuscript.

## 43 362 **Competing interests**

44  
45 363 We declared that we have no any conflicts of interests.

## 364 **Patient and public involvement**

365 Patients and/or the public were not involved in the design, or conduct, or reporting, or  
366 dissemination plans of the research.

## 367 **Patient consent for publication**

368 Consent was obtained from the respondents.

## 369 **Ethical approval**

370 The study involved human participants and was approved by Debre Tabor University,  
371 College of Health Sciences, ethical review board (Ref No.CHS/048/2022). All the  
372 respondents were informed about the purpose of the study, their right to refuse, and  
373 written and signed voluntary consent was obtained from all the respondents prior to  
374 data collection. The respondents were told that the information obtained from them  
375 would be treated with complete confidentiality, and would not cause any harm to them.

## 376 **Provenance and peer review**

377 Not commissioned; externally reviewed.

## 378 **Contributors**

379 Tigabu Munye Aytenuw: Wrote the research proposal, conducted the study, did data  
380 entry and analysis.

381 Yohannes Tesfahun Kassie: Involved in data entry and analysis.

382 Solomon Demis Kebede: Involved in proposal development, and data analysis.

## 383 **Acknowledgement**

384 First and foremost, we would like to extend our deepest gratitude to Debre Tabor  
385 University, college of health science, for giving us the opportunity to conduct this study.

1  
2  
3 386 Secondly, we would like to thank hospital administrators for their permission and unlimited  
4  
5 387 support. Lastly, we also give our heartfelt thanks to all nurses who have participated in this  
6  
7  
8 388 study.

9  
10 389 **Figure 1:** Map of South Gondar Zone (Source; Ethio GIS, 1994).

## 11 390 **REFERENCES**

- 12  
13  
14  
15 391 1. Adola SG. The Status of Sharp Injury and Risk Factors among Health Care  
16  
17 392 Staffs in the Bule Hora Hospital, South Ethiopia, 2020. Stem Cell Research  
18  
19 393 International. 2022 Apr 5;6(1):13-20.
- 20  
21  
22 394 2. Bazie GW. Factors associated with needle stick and sharp injuries among  
23  
24 395 healthcare workers in North East Ethiopia. Risk management and healthcare  
25  
26 396 policy. 2020 Nov 3:2449-56.
- 27  
28  
29 397 3. Beker J, Bamlie T. Needle Stick and sharp injuries and associated factors among  
30  
31 398 nurses working in Jimma University Specialized Hospital, South West Ethiopia. J  
32  
33 399 Nurs Care. 2015 Jan 1;4(291):2167-1168.
- 34  
35  
36 400 4. Bidira K, Woldie M, Nemera G. Prevalence and predictors of needlestick injury  
37  
38 401 among nurses in public hospitals of Jimma Zone, South West Ethiopia. Int J Nurs  
39  
40 402 Midwifery. 2014 Nov 14;6(7):90-6.
- 41  
42  
43 403 5. Getie A, Wondmieneh A, Tesfaw G. The prevalence of needlesticks and sharp  
44  
45 404 injuries, and the associated factors among midwives and nurses in north wollo  
46  
47 405 zone public hospitals, north east Ethiopia: An institution-based cross-sectional  
48  
49 406 study. Drug, Healthcare and Patient Safety. 2020 Oct 15:187-93.
- 50  
51  
52 407 6. Yesuf JH, Bayou NB, Agde ZD. Magnitude of Needle Stick and Sharp Injuries  
53  
54 408 and Associated Factors Among Health Care Workers in Werabe Comprehensive

- 1  
2  
3 409 Specialized Hospital, Southwest Ethiopia: A Cross-Sectional study. medRxiv.  
4  
5 410 2022:2022-11.  
6  
7  
8 411 7. Legesse WT, Anemaw W, Mekonen T, Nigus DM. Prevalence of needle sticks  
9  
10 412 injury and its associated factors among health care workers in Bahir Dar city  
11  
12 413 health centers, Northwest Ethiopia. International Journal of Infection Control.  
13  
14 414 2015 Jun 18;11(2).  
15  
16  
17 415 8. Liyew B, Sultan M, Michael M, Tilahun AD, Kassew T. Magnitude and  
18  
19 416 determinants of needlestick and sharp injuries among nurses working in Tikur  
20  
21 417 Anbessa Specialized Hospital, Addis Ababa, Ethiopia. BioMed research  
22  
23 418 international. 2020 Dec 18;2020.  
24  
25  
26 419 9. Mekonnen R, Yosef H, Teklegiorgis K, Tesfaye F, Dagne I. Magnitude and  
27  
28 420 impact of occupational related needle stick and sharp injuries and associated  
29  
30 421 factors among health care workers in Dire Dawa, Eastern Ethiopia. Med Saf Glob  
31  
32 422 Health. 2018;7(1):2574-0407.  
33  
34  
35 423 10. Sharew NT, Mulu GB, Habtewold TD, Gizachew KD. Occupational exposure to  
36  
37 424 sharps injury among healthcare providers in Ethiopia regional hospitals. Annals  
38  
39 425 of occupational and environmental medicine. 2017 Dec;29(1):1-7.  
40  
41  
42 426 11. Gebremariam BS. Determinants of occupational exposure to blood and body  
43  
44 427 fluids, healthcare workers' risk perceptions and standard precautionary practices:  
45  
46 428 a hospital-based study in Addis Ababa, Ethiopia. Ethiopian Journal of Health  
47  
48 429 Development. 2019;33(1).  
49  
50  
51  
52  
53  
54  
55  
56  
57  
58  
59  
60

- 1  
2  
3 430 12. Tadesse M, Meskele M, Boltena AT. Needle-stick and sharps injuries among  
4  
5 431 health care workers in Wolaita Zone, Southern Ethiopia. *Medical Safety & Global*  
6  
7 432 *Health*. 2016;5(2):1-7.  
8  
9  
10 433 13. Manzoor I, Daud S, Hashmi NR, Sardar H, Babar MS, Rahman A, Malik M.  
11  
12 434 Needle stick injuries in nurses at a tertiary health care facility. *Journal of Ayub*  
13  
14 435 *Medical College Abbottabad*. 2010 Sep 1;22(3):174-8.  
15  
16  
17 436 14. Sahiledengle B, Tekalegn Y, Woldeyohannes D, Quisido BJ. Occupational  
18  
19 437 exposures to blood and body fluids among healthcare workers in Ethiopia: a  
20  
21 438 systematic review and meta-analysis. *Environmental health and preventive*  
22  
23 439 *medicine*. 2020 Dec;25(1):1-4.  
24  
25  
26 440 15. Mbaisi EM, Wanzala P, Omolo J. Prevalence and factors associated with  
27  
28 441 percutaneous injuries and splash exposures among health-care workers in a  
29  
30 442 provincial hospital, Kenya, 2010. *Pan African Medical Journal*. 2013 Apr  
31  
32 443 29;14(1).  
33  
34  
35 444 16. Isara AR, Oguzie KE, Okpogoro OE. Prevalence of needlestick injuries among  
36  
37 445 healthcare workers in the accident and emergency department of a teaching  
38  
39 446 hospital in Nigeria. *Annals of medical and health sciences research*.  
40  
41 447 2015;5(6):392-6.  
42  
43  
44 448 17. Jahangiri M, Rostamabadi A, Hoboubi N, Tadayon N, Soleimani A. Needle stick  
45  
46 449 injuries and their related safety measures among nurses in a university hospital,  
47  
48 450 Shiraz, Iran. *Safety and health at work*. 2016 Mar 1;7(1):72-7.  
49  
50  
51 451 18. Akyol A, Kargin C. Needle stick and sharp injuries among nurses. *Glob J Nurs*  
52  
53 452 *Forensic Stud*. 2016;1(109):2.  
54  
55  
56  
57  
58  
59  
60

- 1  
2  
3 453 19. Markovic-Denic L, Maksimovic N, Marusic V, Vucicevic J, Ostric I, Djuric D.  
4  
5 454 Occupational exposure to blood and body fluids among health-care workers in  
6  
7 455 Serbia. *Medical principles and Practice*. 2015 Nov 1;24(1):36-41.
- 8  
9  
10 456 20. Cho E, Lee H, Choi M, Park SH, Yoo IY, Aiken LH. Factors associated with  
11  
12 457 needlestick and sharp injuries among hospital nurses: a cross-sectional  
13  
14 458 questionnaire survey. *International journal of nursing studies*. 2013 Aug  
15  
16 459 1;50(8):1025-32.
- 17  
18  
19 460 21. Solomon T, Lemessa D. Occupational exposure of health care workers to blood  
20  
21 461 and body fluids in West Shewa Zone, Oromia, Ethiopia, 2018: A cross-sectional  
22  
23 462 study.
- 24  
25  
26 463 22. Bekele T, Gebremariam A, Kaso M, Ahmed K. Factors associated with  
27  
28 464 occupational needle stick and sharps injuries among hospital healthcare workers  
29  
30 465 in Bale Zone, Southeast Ethiopia. *PloS one*. 2015 Oct 15;10(10):e0140382.
- 31  
32  
33 466 23. Geravandi S, Alavi SM, Yari AR, Yousefi F, Hosseini SA, Kamaei S, Mohammadi  
34  
35 467 MJ, Gravand PM. Epidemiological Aspects of Needle Stick Injuries among Health  
36  
37 468 Care Workers in Razi Hospital Ahvaz, Iran, in 2015. *Archives of Hygiene*  
38  
39 469 *Sciences*. 2016 Apr 1;5(2).
- 40  
41  
42 470 24. Tebeje B, Hailu C. Assessment of HIV post-exposure prophylaxis use among  
43  
44 471 health workers of governmental health institutions in Jimma Zone, Oromiya  
45  
46 472 Region, Southwest Ethiopia. *Ethiopian journal of health sciences*. 2010;20(1).
- 47  
48  
49 473 25. Aderaw Z. Assessment on magnitude of needle stick and sharp injuries and  
50  
51 474 associated factors among health care workers in East Gojjam zone health  
52  
53  
54  
55  
56  
57  
58  
59  
60



- 1  
2  
3 475 institutions, Amahara Regional State, Ethiopia. Global journal of medical  
4  
5 476 research. 2013;13(3):41-9.  
6  
7  
8 477 26. Habib H, Khan EA, Aziz A. Prevalence and factors associated with needle stick  
9  
10 478 injuries among registered nurses in public sector tertiary care hospitals of  
11  
12 479 Pakistan. International Journal of Collaborative Research on Internal Medicine &  
13  
14 480 Public Health. 2011 Feb 1;3(2):124-30.  
15  
16  
17 481 27. Elsous A, Ouda M, Mohsen S, Al-Shaikh M, Mokayad S, Hamad AA. Needle  
18  
19 482 stick injuries among nurses of secondary care hospital: A cross-sectional study  
20  
21 483 from Gaza Strip. Annals of International Medical and Dental Research.  
22  
23 484 2016;2(2):54.  
24  
25  
26 485

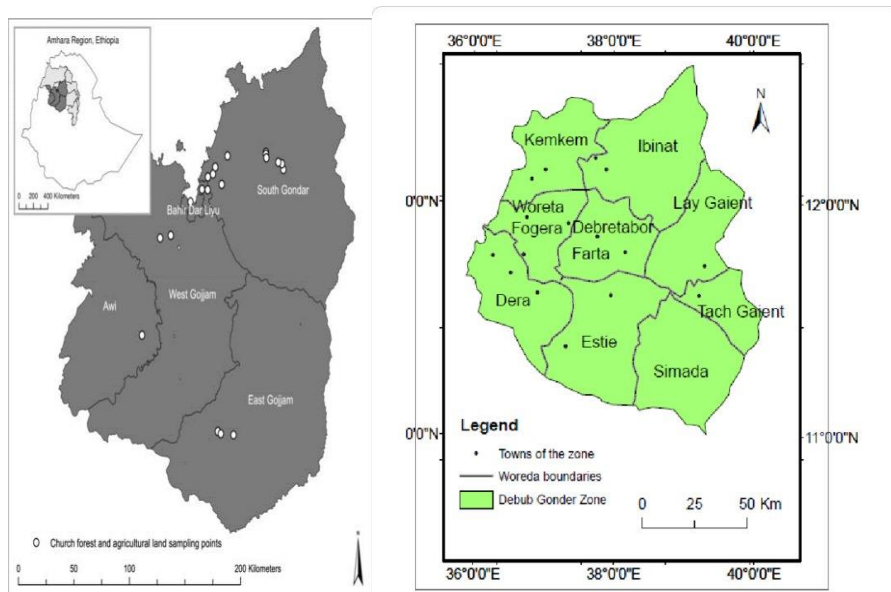

Figure 1: Map of South Gondar Zone (Source; Ethio GIS, 1994)

er review only

# Reporting checklist for cross sectional study.

Based on the STROBE cross sectional guidelines.

## Instructions to authors

Complete this checklist by entering the page numbers from your manuscript where readers will find each of the items listed below.

Your article may not currently address all the items on the checklist. Please modify your text to include the missing information. If you are certain that an item does not apply, please write "n/a" and provide a short explanation.

Upload your completed checklist as an extra file when you submit to a journal.

In your methods section, say that you used the STROBE cross sectional reporting guidelines, and cite them as:

von Elm E, Altman DG, Egger M, Pocock SJ, Gøtzsche PC, Vandenbroucke JP. The Strengthening the Reporting of Observational Studies in Epidemiology (STROBE) Statement: guidelines for reporting observational studies.

| Reporting Item                                                                                                                                             | Page Number |
|------------------------------------------------------------------------------------------------------------------------------------------------------------|-------------|
| <b>Title and abstract</b>                                                                                                                                  |             |
| Title <a href="#">#1a</a> Indicate the study's design with a commonly used term in the title or the abstract                                               | 1           |
| Abstract <a href="#">#1b</a> Provide in the abstract an informative and balanced summary of what was done and what was found                               | 1           |
| <b>Introduction</b>                                                                                                                                        |             |
| Background / <a href="#">#2</a> Explain the scientific background and rationale for the investigation being reported<br>rationale                          | 1-3         |
| Objectives <a href="#">#3</a> State specific objectives, including any prespecified hypotheses                                                             | 4           |
| <b>Methods</b>                                                                                                                                             |             |
| Study design <a href="#">#4</a> Present key elements of study design early in the paper                                                                    | 4           |
| Setting <a href="#">#5</a> Describe the setting, locations, and relevant dates, including periods of recruitment, exposure, follow-up, and data collection | 4           |

|    |                      |                      |                                                                                                              |     |
|----|----------------------|----------------------|--------------------------------------------------------------------------------------------------------------|-----|
| 1  | Eligibility criteria | <a href="#">#6a</a>  | Give the eligibility criteria, and the sources and methods of selection of participants.                     | 5   |
| 2  |                      |                      |                                                                                                              |     |
| 3  |                      |                      |                                                                                                              |     |
| 4  |                      | <a href="#">#7</a>   | Clearly define all outcomes, exposures, predictors, potential confounders, and effect modifiers. Give        | 5-6 |
| 5  |                      |                      | diagnostic criteria, if applicable                                                                           |     |
| 6  |                      |                      |                                                                                                              |     |
| 7  |                      |                      |                                                                                                              |     |
| 8  | Data sources /       | <a href="#">#8</a>   | For each variable of interest give sources of data and details of methods of assessment (measurement).       | 6-7 |
| 9  | measurement          |                      | Describe comparability of assessment methods if there is more than one group. Give information separately    |     |
| 10 |                      |                      | for for exposed and unexposed groups if applicable.                                                          |     |
| 11 |                      |                      |                                                                                                              |     |
| 12 |                      |                      |                                                                                                              |     |
| 13 |                      |                      |                                                                                                              |     |
| 14 | Bias                 | <a href="#">#9</a>   | Describe any efforts to address potential sources of bias                                                    | 7   |
| 15 |                      |                      |                                                                                                              |     |
| 16 |                      |                      |                                                                                                              |     |
| 17 | Study size           | <a href="#">#10</a>  | Explain how the study size was arrived at                                                                    | 5   |
| 18 |                      |                      |                                                                                                              |     |
| 19 | Quantitative         | <a href="#">#11</a>  | Explain how quantitative variables were handled in the analyses. If applicable, describe which groupings     | 7-8 |
| 20 | variables            |                      | were chosen, and why                                                                                         |     |
| 21 |                      |                      |                                                                                                              |     |
| 22 |                      |                      |                                                                                                              |     |
| 23 |                      |                      |                                                                                                              |     |
| 24 | Statistical methods  | <a href="#">#12a</a> | Describe all statistical methods, including those used to control for confounding                            | 7-8 |
| 25 |                      |                      |                                                                                                              |     |
| 26 |                      |                      |                                                                                                              |     |
| 27 | Statistical methods  | <a href="#">#12b</a> | Describe any methods used to examine subgroups and interactions                                              | 7-8 |
| 28 |                      |                      |                                                                                                              |     |
| 29 | Statistical methods  | <a href="#">#12c</a> | Explain how missing data were addressed                                                                      | 7-8 |
| 30 |                      |                      |                                                                                                              |     |
| 31 |                      |                      |                                                                                                              |     |
| 32 | Statistical methods  | <a href="#">#12d</a> | If applicable, describe analytical methods taking account of sampling strategy                               | 7-8 |
| 33 |                      |                      |                                                                                                              |     |
| 34 | Statistical methods  | <a href="#">#12e</a> | Describe any sensitivity analyses                                                                            | 7-8 |
| 35 |                      |                      |                                                                                                              |     |
| 36 |                      |                      |                                                                                                              |     |
| 37 | <b>Results</b>       |                      |                                                                                                              |     |
| 38 |                      |                      |                                                                                                              |     |
| 39 |                      |                      |                                                                                                              |     |
| 40 | Participants         | <a href="#">#13a</a> | Report numbers of individuals at each stage of study—eg numbers potentially eligible, examined for           | 9   |
| 41 |                      |                      | eligibility, confirmed eligible, included in the study, completing follow-up, and analysed. Give information |     |
| 42 |                      |                      | separately for for exposed and unexposed groups if applicable.                                               |     |
| 43 |                      |                      |                                                                                                              |     |
| 44 |                      |                      |                                                                                                              |     |
| 45 |                      |                      |                                                                                                              |     |
| 46 | Participants         | <a href="#">#13b</a> | Give reasons for non-participation at each stage                                                             | 9   |
| 47 |                      |                      |                                                                                                              |     |
| 48 |                      |                      |                                                                                                              |     |
| 49 | Participants         | <a href="#">#13c</a> | Consider use of a flow diagram                                                                               | 10  |
| 50 |                      |                      |                                                                                                              |     |
| 51 | Descriptive data     | <a href="#">#14a</a> | Give characteristics of study participants (eg demographic, clinical, social) and information on exposures   | 10  |
| 52 |                      |                      | and potential confounders. Give information separately for exposed and unexposed groups if applicable.       |     |
| 53 |                      |                      |                                                                                                              |     |
| 54 |                      |                      |                                                                                                              |     |
| 55 |                      |                      |                                                                                                              |     |
| 56 | Descriptive data     | <a href="#">#14b</a> | Indicate number of participants with missing data for each variable of interest                              | 10  |
| 57 |                      |                      |                                                                                                              |     |
| 58 |                      |                      |                                                                                                              |     |
| 59 |                      |                      |                                                                                                              |     |
| 60 |                      |                      |                                                                                                              |     |

|    |                   |                      |                                                                                                                    |       |
|----|-------------------|----------------------|--------------------------------------------------------------------------------------------------------------------|-------|
| 1  | Outcome data      | <a href="#">#15</a>  | Report numbers of outcome events or summary measures. Give information separately for exposed and                  | 10-12 |
| 2  |                   |                      | unexposed groups if applicable.                                                                                    |       |
| 3  |                   |                      |                                                                                                                    |       |
| 4  |                   |                      |                                                                                                                    |       |
| 5  | Main results      | <a href="#">#16a</a> | Give unadjusted estimates and, if applicable, confounder-adjusted estimates and their precision (eg, 95%           | 13-14 |
| 6  |                   |                      | confidence interval). Make clear which confounders were adjusted for and why they were included                    |       |
| 7  |                   |                      |                                                                                                                    |       |
| 8  |                   |                      |                                                                                                                    |       |
| 9  |                   |                      |                                                                                                                    |       |
| 10 | Main results      | <a href="#">#16b</a> | Report category boundaries when continuous variables were categorized                                              | 13-14 |
| 11 |                   |                      |                                                                                                                    |       |
| 12 | Main results      | <a href="#">#16c</a> | If relevant, consider translating estimates of relative risk into absolute risk for a meaningful time period       | 13-14 |
| 13 |                   |                      |                                                                                                                    |       |
| 14 |                   |                      |                                                                                                                    |       |
| 15 | Other analyses    | <a href="#">#17</a>  | Report other analyses done—e.g., analyses of subgroups and interactions, and sensitivity analyses                  | 13-14 |
| 16 |                   |                      |                                                                                                                    |       |
| 17 |                   |                      |                                                                                                                    |       |
| 18 | Discussion        |                      |                                                                                                                    |       |
| 19 |                   |                      |                                                                                                                    |       |
| 20 | Key results       | <a href="#">#18</a>  | Summarise key results with reference to study objectives                                                           | 13-14 |
| 21 |                   |                      |                                                                                                                    |       |
| 22 |                   |                      |                                                                                                                    |       |
| 23 | Limitations       | <a href="#">#19</a>  | Discuss limitations of the study, taking into account sources of potential bias or imprecision. Discuss both       | 17    |
| 24 |                   |                      | direction and magnitude of any potential bias.                                                                     |       |
| 25 |                   |                      |                                                                                                                    |       |
| 26 |                   |                      |                                                                                                                    |       |
| 27 | Interpretation    | <a href="#">#20</a>  | Give a cautious overall interpretation considering objectives, limitations, multiplicity of analyses, results from | 14-17 |
| 28 |                   |                      | similar studies, and other relevant evidence.                                                                      |       |
| 29 |                   |                      |                                                                                                                    |       |
| 30 |                   |                      |                                                                                                                    |       |
| 31 |                   |                      |                                                                                                                    |       |
| 32 | Generalisability  | <a href="#">#21</a>  | Discuss the generalisability (external validity) of the study results                                              | 17    |
| 33 |                   |                      |                                                                                                                    |       |
| 34 | Other Information |                      |                                                                                                                    |       |
| 35 |                   |                      |                                                                                                                    |       |
| 36 |                   |                      |                                                                                                                    |       |
| 37 | Funding           | <a href="#">#22</a>  | Give the source of funding and the role of the funders for the present study and, if applicable, for the original  | 18    |
| 38 |                   |                      | study on which the present article is based                                                                        |       |
| 39 |                   |                      |                                                                                                                    |       |
| 40 |                   |                      |                                                                                                                    |       |

41  
42 The STROBE checklist is distributed under the terms of the Creative Commons Attribution License CC-BY. This checklist was completed on 10. March  
43 2023 using <https://www.goodreports.org/>, a tool made by the [EQUATOR Network](#) in collaboration with [Penelope.ai](#)  
44  
45  
46  
47  
48  
49  
50  
51  
52  
53  
54  
55  
56  
57  
58  
59  
60

# BMJ Open

## Magnitude of occupational exposure to sharp injuries among Nurses working in South Gondar zone public hospitals, Northcentral Ethiopia: Institution-based cross-sectional study

|                                 |                                                                                                                                                                                                               |
|---------------------------------|---------------------------------------------------------------------------------------------------------------------------------------------------------------------------------------------------------------|
| Journal:                        | <i>BMJ Open</i>                                                                                                                                                                                               |
| Manuscript ID                   | bmjopen-2023-073595.R2                                                                                                                                                                                        |
| Article Type:                   | Original research                                                                                                                                                                                             |
| Date Submitted by the Author:   | 20-Sep-2023                                                                                                                                                                                                   |
| Complete List of Authors:       | Aytenew, Tigabu; Debre Tabor University, Department of Nursing<br>Kassie, Yohannes Tesfahun; Debre Tabor University<br>Kebede, Solomon; Debre Tabor University, Department of Pediatrics and Neonatal Nursing |
| <b>Primary Subject Heading</b>: | Occupational and environmental medicine                                                                                                                                                                       |
| Secondary Subject Heading:      | Infectious diseases                                                                                                                                                                                           |
| Keywords:                       | Risk management < HEALTH SERVICES ADMINISTRATION & MANAGEMENT, INFECTIOUS DISEASES, Infection control < INFECTIOUS DISEASES, Safety                                                                           |
|                                 |                                                                                                                                                                                                               |

SCHOLARONE™  
Manuscripts



I, the Submitting Author has the right to grant and does grant on behalf of all authors of the Work (as defined in the below author licence), an exclusive licence and/or a non-exclusive licence for contributions from authors who are: i) UK Crown employees; ii) where BMJ has agreed a CC-BY licence shall apply, and/or iii) in accordance with the terms applicable for US Federal Government officers or employees acting as part of their official duties; on a worldwide, perpetual, irrevocable, royalty-free basis to BMJ Publishing Group Ltd ("BMJ") its licensees and where the relevant Journal is co-owned by BMJ to the co-owners of the Journal, to publish the Work in this journal and any other BMJ products and to exploit all rights, as set out in our [licence](#).

The Submitting Author accepts and understands that any supply made under these terms is made by BMJ to the Submitting Author unless you are acting as an employee on behalf of your employer or a postgraduate student of an affiliated institution which is paying any applicable article publishing charge ("APC") for Open Access articles. Where the Submitting Author wishes to make the Work available on an Open Access basis (and intends to pay the relevant APC), the terms of reuse of such Open Access shall be governed by a Creative Commons licence – details of these licences and which [Creative Commons](#) licence will apply to this Work are set out in our licence referred to above.

Other than as permitted in any relevant BMJ Author's Self Archiving Policies, I confirm this Work has not been accepted for publication elsewhere, is not being considered for publication elsewhere and does not duplicate material already published. I confirm all authors consent to publication of this Work and authorise the granting of this licence.

1  
2  
3 1 **Magnitude of occupational exposure to sharp injuries among Nurses working in**  
4  
5 2 **South Gondar zone public hospitals, Northcentral Ethiopia: Institution-based**  
6  
7 3 **cross-sectional study**  
8  
9

10 4 Tigabu Munye Aytnew<sup>1\*</sup>, Yohannes Tesfahun Kassie<sup>2</sup>, Solomon Demis Kebede<sup>3</sup>

11  
12 5 <sup>1</sup>Department of Nursing, College of Health Sciences, Debre Tabor University, Debre  
13  
14 6 Tabor, Ethiopia

15  
16  
17 7 <sup>2</sup>College of Health Sciences, Debre Tabor University, Debre Tabor, Ethiopia

18  
19 8 <sup>3</sup>Department of Maternity and Neonatal Nursing, College of Health Sciences, Debre  
20  
21 9 Tabor University, Debre Tabor, Ethiopia

22  
23  
24 10 \*Corresponding author: Tigabu Munye Aytnew. *Tele: +251921613861 Fax:*

25  
26 11 0581410533, and

27  
28 12 *Email: [tigabumunye21@gmail.com](mailto:tigabumunye21@gmail.com)*

29  
30 13 YT: [tesfahunyohannes08@gmail.com](mailto:tesfahunyohannes08@gmail.com)

31  
32 14 SD: [solomondemis@gmail.com](mailto:solomondemis@gmail.com)

33  
34  
35 15 **ABSTRACT**

36  
37  
38 16 **Objective:** The study aimed to determine the magnitude of occupational exposure to  
39  
40 17 sharp injuries and identify its associated factors among nurses.

41  
42  
43 18 **Design:** Institution-based cross-sectional study design was conducted from November  
44  
45 19 01-30/2022.

46  
47  
48 20 **Analysis:** The collected data were entered into Epi-Data version 4.2; then, exported to  
49  
50 21 Stata version 14 for analysis. Variables with a p-value of <0.05 at 95% CI were considered  
51  
52 22 significantly associated with occupational exposure to sharp injuries.

53  
54 23 **Setting:** The study was conducted in South Gondar zone public hospitals.  
55  
56  
57



24 **Participants:** Nurses working in South Gondar zone public hospitals.

25 **Results:** Of the total respondents, 213 (56.65%) were between the age of 25-34 with the  
26 mean  $\pm$  SD of age 30.22  $\pm$  6.63 years. Similarly, 202 (53.72%) of the respondents were  
27 females. This study finding showed that the magnitude of occupational exposure to sharp  
28 injuries among nurses was 52.39% (95%CI: 47.92%, 56.37%). Moreover, this study  
29 finding showed that year of service >10 years (AOR=2.35, 95%CI: 1.21,4.57), lack of  
30 infection prevention training (AOR=1.85, 95%CI: 1.09, 3.45), job-related stress  
31 (AOR=2.24, 95%CI: 1.27, 3.89) and presence of contaminated sharps at workplace  
32 (AOR=2.76, 95%CI: 1.67, 4.72) were significantly associated with occupational exposure  
33 to sharp injuries among nurses.

34 **Conclusions:** Generally, this study finding reported that the magnitude of occupational  
35 exposure to sharp injuries among nurses was high. This study finding also showed that  
36 years of service >10 years, lack of infection prevention training, job-related stress and the  
37 presence of contaminated sharps at workplace were independent predictors of  
38 occupational exposure to sharp injuries among nurses. Hence, all the concerned bodies  
39 should strengthen regular provision of infection prevention training to nurses at all levels.  
40 Nurses should practice proper use of safety box more than ever in order to avoid the  
41 presence of contaminated needles and other sharp materials at workplace.

42 **Keywords:** Occupational exposure to sharp injuries, Nurses, Public hospitals.

### 43 **Strengths and limitations of this study**

- 44 ◆ The findings could be strong evidence as a result of using census method.
- 45 ◆ The study might be subjected to recall and social desirability biases.
- 46 ◆ The study also might not show cause and effect relationships.

## 47 **BACKGROUND**

48 A sharp injury is "an accidental penetrating wound with an instrument that is potentially  
49 contaminated with the body fluid of another person" [1-10]. Sharp injuries occur when  
50 health care providers perform their clinical activities in the health care facilities, such as  
51 hospitals, health centers and clinics [3]. The majority of sharp injuries occur during  
52 administering injections, securing IV lines, drawing blood, checking blood sugar,  
53 recapping needles, poor handling and disposing of needles, and transferring blood or  
54 body fluids from a syringe to a specimen container [3, 4].

55 Globally, of the total of 35 million health care providers, it is estimated that 3 million  
56 experience sharp injuries every year; of these, nurses are at the greatest risk, with up to  
57 50% of all sharp injuries being sustained by nurses [11, 12]. Because nurses have the  
58 highest rate of encountering sharp injuries among health care providers due to their  
59 prolonged exposure to needles and other sharp devices [13]. Most of these sharp injuries  
60 (90%) occur in developing countries, where the burden of blood borne infections in the  
61 general population is high and access to safety devices and personal protective  
62 equipments (PPEs) is limited, specifically more common in sub-Saharan African countries  
63 [14].

64 On average, health care providers in Africa suffer 2 to 4 sharp injuries every year [15]. In  
65 Sub-Saharan Africa, the magnitude of sharp injuries and their associated factors are not  
66 clearly understood among health care providers [16]. A study conducted in Jimma  
67 University Specialized Teaching Hospital (JUSTH), Ethiopia reported that the magnitude  
68 of occupational exposure to sharp injuries among nurses was 61.76% [3]. Sharp injuries  
69 are markedly the most common and preventable occupational hazards that health care

1  
2  
3 70 providers are exposed to and become high risk for the transmission of a variety of blood  
4  
5 71 borne infections, such as hepatitis B virus (HBV), hepatitis C virus (HCV) and human  
6  
7 72 immunodeficiency virus (AIDS) [17, 18].  
8  
9

10 73 Blood-borne infections following sharp injuries have serious consequences, including  
11  
12 74 long-term illness, psychological stress to the victims ,colleagues and family, disability and  
13  
14 75 death [19]. In addition to the potential risks for infectious diseases, they also suffer for  
15  
16 76 direct costs required for laboratory tests, including tests for HIV antibodies, hepatitis B  
17  
18 77 serology and a baseline test for hepatitis C as well as any treatments for these infections  
19  
20 78 [20]. The implementation of education, universal precautions, elimination of needle  
21  
22 79 recapping, and use of sharp containers for safe disposal have reduced the chance of  
23  
24 80 getting sharp injuries by 80% [6, 21].  
25  
26  
27  
28

29 81 Health care providers who followed universal precautions were 66% less likely to have  
30  
31 82 needle sticks and sharp injuries than those who did not follow [22]. Training of handling  
32  
33 83 objects, using instruments to grasp needles, reduction of the use of sharp devices,  
34  
35 84 avoiding hand-to-hand passing of sharp instruments, decreasing of direct contact with  
36  
37 85 needles, an appropriate disposal and using safety boxes properly can decrease the risk  
38  
39 86 of getting sharp injuries [23].  
40  
41  
42

43 87 In Ethiopia, where primary health care services are covered by nurses, it is important to  
44  
45 88 develop their knowledge and practice on universal precautions since the risks of getting  
46  
47 89 infections following sharp injuries are high in their day to day activities [4]. However, there  
48  
49 90 is limited information in the study area that describes the magnitude of sharp injuries and  
50  
51 91 its predictors among nurses. Therefore, this study aimed to determine the magnitude of  
52  
53 92 occupational exposure to sharp injuries and identify its associated factors.  
54  
55  
56  
57

## 93 **General objective**

94 To assess the magnitude of occupational exposure to sharp injuries among nurses  
95 working in South Gondar zone public hospitals, Northcentral Ethiopia from November 01-  
96 30, 2022

## 97 **Specific objectives**

98 To determine the magnitude of occupational exposure to sharp injuries among nurses  
99 working in South Gondar zone public hospitals, Northcentral Ethiopia from November 01-  
100 30, 2022.

101 To identify the predictors of occupational exposure to sharp injuries among nurses  
102 working in South Gondar zone public hospitals, Northcentral Ethiopia from November 01-  
103 30, 2022.

## 104 **METHODS**

### 105 **Study design, area and Period**

106 Institution-based cross-sectional study design was conducted among nurses working in  
107 South Gondar zone public hospitals from November 01-30, 2022. South Gondar is one  
108 of the zonal administrations in Amhara region, Northern Ethiopia with an estimated area  
109 of 14,095.19 square kilometers. It is located by South and North Wollo zones in the East,  
110 Bahirdar Liyu zone and Lake Tana in the West, Central Gondar in the North, Waghimra  
111 zone in the Northeast and East and West Gojjam zones in the South (Figure 1). There  
112 are ten public hospitals in the zone, namely Debre Tabor comprehensive specialized  
113 hospital, Addis Zemen, Ebnat, Mekane-Eyesus, Andabet, Wogeda, Woreta, Nefas  
114 Mewucha, Dr. Ambachew Makonnen and Migbaru Kebede primary hospitals.

### 115 **Source Population**

1  
2  
3 116 All nurses working in all South Gondar zone public hospitals.  
4

5  
6 117 **Study Population**  
7

8 118 All nurses working in all South Gondar zone public hospitals.  
9

10  
11 119 **Inclusion and exclusion criteria**  
12

13 120 All nurses working in all South Gondar zone public hospitals at the time of the data  
14  
15 121 collection period were included in the study; whereas nurses who were on sick leave,  
16  
17 122 maternity leave, annual leave, and training at the time of data collection period were  
18  
19 123 excluded from the study.  
20  
21

22  
23 124 **Patient and public involvement**  
24

25 125 Patients and/or the public were not involved in the design, or conduct, or reporting, or  
26  
27 126 dissemination plans of the research.  
28

29  
30 127 **Sample size determination**  
31

32 128 The sample size (n) was calculated by Computer-based Epi info7 software using a single  
33  
34 129 population proportion at 95% CI, with a 5% margin of error, and by assuming the burden  
35  
36 130 of occupational exposure to sharp injuries among nurses to be 61.76% [3].  
37  
38

$$39 \quad n = \frac{(Z_{\alpha/2})^2 P (1-P)}{40 \quad d^2}$$

41 132  
42 133 *Where:* - n= the minimum sample size required for the study

43  
44 134 Z= standard normal distribution (Z=1.96) with a 95% confidence interval

45  
46 135 P= burden of occupational exposure to sharp injuries among nurses

47  
48 136 (61.76%=0.6176)

49  
50 137 d= is a tolerable margin of error (d=5%=0.05)

$$51 \quad n = \frac{(1.96)^2 0.6176(1-0.6176)}{52 \quad d^2}$$

1  
2  
3 139 (0.05)<sup>2</sup>  
4

5 140 n=363. Then, by adding a 10% (0.1) non-response rate, the final sample size (n)  
6  
7  
8 141 was calculated to be 400. But, since it was the minimum sample size required, and the  
9  
10 142 source population was only 402, the source population (402) was taken as a sample size  
11  
12 143 for this study (census method was used).  
13

## 14 144 **Dependent Variable**

15 145 Occupational exposure to sharp injuries  
16  
17  
18

## 19 146 **Independent variables**

20 147 Socio-demographic characteristics: Age, sex, marital status, level of education and years  
21  
22  
23 148 of service.  
24

25 149 Behavioral characteristics: Sleeping disturbance, following of standard precaution guide  
26  
27 150 line, use of PPE, knowledge of standard precautions and job-related stress.  
28

29 151 Work environment characteristics: Length of stay/shift, health and safety information  
30  
31  
32 152 access, infection prevention training, work load, availability of safety box, availability of  
33  
34 153 standard precaution guidelines and presence of contaminated sharps.  
35  
36  
37

## 38 154 **Operational Definitions**

39  
40  
41 155 **Occupational exposure to sharp injuries:** Any kind of needle stick and/or other sharp  
42  
43 156 injury which occurred among nurses in relation to his/her job in the health care facility [4].  
44

45 157 **Knowledge:** Nurses who have scored  $\geq 75\%$  (9) of 12 knowledge-related questions were  
46  
47  
48 158 considered to have adequate knowledge; whereas nurses who have scored below 75%  
49  
50 159 were also considered to have inadequate knowledge towards sharp injuries [24].  
51

52 160 **Job-related stress:** Nurses who scored above or equal to the mean score (32.78) of the  
53  
54  
55 161 Likert-scale questions that used to assess nurses' job-related stress were considered  
56  
57

1  
2  
3 162 they have a job-related stress, whereas nurses who scored below the mean score were  
4  
5 163 also considered they didn't have job-related stress [25].  
6

7  
8 164 **Workload:** When one trained intensive care unit (ICU) nurse provides nursing care  
9  
10 165 services for more than two patients in the ICU, and when one nurse provides nursing care  
11  
12 166 services for more than 6 patients in inpatient departments per shift [25].  
13

14  
15 167 **Sleeping disturbance:** The presence of sleeping problems while the health care provider  
16  
17 168 is at workplace [25].  
18

### 19 169 **Data collection tool and procedure**

20  
21  
22 170 A structured and pre-tested self-administered English version questionnaire was used to  
23  
24 171 collect the data. The questionnaire was prepared by reviewing different literatures [3, 4,  
25  
26 172 25], and using standardized Expanded Nursing Stress Scale (ENSS) Likert-scale  
27  
28 173 questions to assess job-related stress of the respondents [3, 4, 25].  
29

30  
31 174 The questionnaire contains nurses' socio-demographic, behavioral, environmental  
32  
33 175 characteristics, knowledge questions related to standard precaution and standardized  
34  
35 176 Likert-scale questions to assess job-related stress of the respondents. Reliability of the  
36  
37 177 tool was established with an overall Cronbach's alpha score (0.74 for knowledge  
38  
39 178 questions related to standard precaution, and 0.79 for job-related stress Likert-scale  
40  
41 179 questions). Training was given to the data collectors, and before giving the questionnaire,  
42  
43 180 the data collectors informed the nurses about the aims/purposes, risks and possible  
44  
45 181 benefits of the study, the right and refusal to participate in the study, and that the collected  
46  
47 182 information would be kept confidential.  
48  
49  
50  
51  
52  
53  
54  
55  
56  
57  
58  
59  
60

1  
2  
3 183 After all, those nurses who were willing and have signed the informed voluntary consent  
4  
5 184 form were requested to fill out the questionnaire. The data collection was held for four  
6  
7  
8 185 consecutive weeks (from November 01-30/2022).  
9

## 10 186 **Data quality control**

11  
12 187 Five percent of the questionnaire was pre-tested from October 23-27/2022 in Koladiba  
13  
14  
15 188 primary hospital to assess the reliability, clarity, consistency, understandability and the  
16  
17 189 total time that it would take to complete the questionnaire prior to the actual data  
18  
19  
20 190 collection. Then, the necessary comments and feedback were incorporated in the final  
21  
22 191 tool to improve its quality. Training was given for the data collectors regarding the  
23  
24 192 objective of the study, data collection tool, ways of data collection, checking the  
25  
26 193 completeness of the collected data, and how to maintain confidentiality.  
27

28  
29 194 The collected data were checked for completeness, cleaned, edited, coded manually, and  
30  
31 195 entered into Epi data version 4.2. Double data entry was done for its validity, and  
32  
33 196 compared to the original data. Outliers were checked, and simple frequencies and cross  
34  
35  
36 197 tabulation were done for missing values and variables.  
37

## 38 198 **Data processing and analysis**

39  
40  
41 199 Then after, the data were exported to Stata version 14 for analysis. Descriptive analysis  
42  
43 200 was done by computing proportions and summary statistics. The information was  
44  
45 201 presented using simple frequencies, summary measures, tables, and figures. Binary  
46  
47  
48 202 logistic regression was used to identify the associated factors of occupational exposure  
49  
50 203 to sharp injuries. Bivariate and multivariate analyses were used to see the association  
51  
52 204 between the outcome variable, and each independent variable. The assumptions for  
53  
54  
55  
56  
57  
58  
59  
60



205 binary logistic regression were checked. The goodness of fit was tested by Hosmer-  
 206 Lemeshow statistics and Omnibus tests.

207 All variables with  $P < 0.2$  in the bivariate analysis were included in the final multivariable  
 208 analysis model in order to control all the possible confounders, and the variables were  
 209 selected using enter method. The adjusted odds ratio (AOR) along with a 95% CI was  
 210 estimated to identify the associated factors of occupational exposure to sharp injuries. In  
 211 this study, variables with a P-value of  $< 0.05$  were considered significantly associated with  
 212 occupational exposure to sharp injuries.

## 213 RESULTS

214 Of the total of 402 respondents, 376 were included in the final analysis, giving a response  
 215 rate of 93.53%.

### 216 Socio-demographic and working environment related attributes

217 Of the total respondents, 213 (56.65%) were between the age of 25-34 with the mean  $\pm$   
 218 SD of age  $30.22 \pm 6.63$  years. Similarly, 202 (53.72%) of the respondents were females.  
 219 Additionally, only 89 (23.67%) of the respondents got infection prevention training.  
 220 Moreover, 271 (72.07%) of them had safety boxes at workplace to dispose needles and  
 221 other sharp materials after use, and 214 (56.91%) of respondents also stated that there  
 222 were contaminated needles and sharp materials at workplace (Table 1).

225 Table 1: Socio-demographic characteristics of the respondents working in South Gondar  
 226 zone public hospitals, Northcentral Ethiopia, 2022 (n=376).

| Variables | Category | Frequency | Percentage (%) |
|-----------|----------|-----------|----------------|
|-----------|----------|-----------|----------------|

|                                      |                  |     |       |
|--------------------------------------|------------------|-----|-------|
| Age                                  | ≤24              | 68  | 18.09 |
|                                      | 25-34            | 213 | 56.65 |
|                                      | 35-44            | 71  | 18.88 |
|                                      | ≥45              | 24  | 6.38  |
| Sex                                  | Male             | 174 | 46.28 |
|                                      | Female           | 202 | 53.72 |
| Marital status                       | Single           | 171 | 45.48 |
|                                      | Married          | 183 | 48.67 |
|                                      | Divorced         | 17  | 4.52  |
|                                      | Widowed          | 5   | 1.33  |
| Educational level                    | Diploma          | 132 | 35.11 |
|                                      | BSc              | 244 | 64.89 |
| Years of service                     | <5               | 136 | 36.17 |
|                                      | 5-10             | 128 | 34.04 |
|                                      | >10              | 112 | 29.79 |
| Sleeping disturbance problem         | Yes              | 274 | 72.87 |
|                                      | No               | 102 | 27.13 |
| Use of PPEs                          | All of the time  | 185 | 49.20 |
|                                      | Most of the time | 102 | 27.13 |
|                                      | Sometimes        | 73  | 19.41 |
|                                      | Never use        | 16  | 4.26  |
| Workload in the unit                 | Yes              | 212 | 56.38 |
|                                      | No               | 164 | 43.62 |
| Length of stay/shift at work         | ≤8 hours         | 193 | 51.33 |
|                                      | 9-14 hours       | 35  | 9.31  |
|                                      | ≥15 hours        | 148 | 39.36 |
| Health and safety information access | Yes              | 291 | 77.39 |
|                                      | No               | 85  | 22.61 |
| Training on IP                       | Yes              | 89  | 23.67 |
|                                      | No               | 287 | 76.33 |

1  
2  
3  
4  
5  
6  
7  
8  
9  
10  
11  
12  
13  
14  
15  
16  
17  
18  
19  
20  
21  
22  
23

|                                              |                      |     |       |
|----------------------------------------------|----------------------|-----|-------|
| Availab. of safety box at workplace          | Yes                  | 271 | 72.07 |
|                                              | No                   | 105 | 27.93 |
| Availab. of universal precaution guide line  | Yes                  | 212 | 56.38 |
|                                              | No                   | 164 | 43.62 |
| Following universal precaution guide line    | Yes                  | 93  | 43.87 |
|                                              | No                   | 119 | 56.13 |
| Presence of contaminated sharps at workplace | Yes                  | 214 | 56.91 |
|                                              | No                   | 162 | 43.09 |
| Knowledge of standard precaution             | Adequate knowledge   | 134 | 35.64 |
|                                              | Inadequate knowledge | 242 | 64.36 |
| Job-related stress                           | Stressed             | 237 | 63.03 |
|                                              | Not stressed         | 139 | 36.97 |

227 \*BSc, Bachelor of Science; \*IP, infection prevention; PPEs, personal protective  
228 equipments

### 229 **Magnitude of occupational exposure to sharp injuries**

230 This study finding showed that the magnitude of occupational exposure to sharp injuries  
231 among nurses was 52.39% (95%CI: 47.92%, 56.37%) (197).

232 The occurrence of occupational exposure to sharp injuries was the highest among  
233 respondents with the age of 45 years and above (62.50). Likewise, the majority of males,  
234 108(62.07) also got occupational exposure to sharp injuries. Occupational exposure to  
235 sharp injuries was also the highest among diploma nurses, and nurses having more than  
236 10 years of service (59.85% and 62.50%) respectively. Moreover, the occurrence of sharp  
237 injuries was also the highest among nurses working along with the presence of  
238 contaminated sharps at workplace (63.55%) (Table 2).

239 Table 2: Distribution of sharp injuries among nurses working in South Gondar zone public  
240 hospitals, Northcentral Ethiopia, 2022 (n=376).

| Variables | Categories | Occupational exposure to sharp injuries |
|-----------|------------|-----------------------------------------|
|-----------|------------|-----------------------------------------|

|                                    |                  | Yes (%)    | No (%)     |
|------------------------------------|------------------|------------|------------|
| Age                                | ≤24              | 32(47.06)  | 36(52.94)  |
|                                    | 25-34            | 111(52.11) | 102(47.89) |
|                                    | 35-44            | 39(54.93)  | 32(45.07)  |
|                                    | ≥45              | 15(62.50)  | 9(37.50)   |
| Sex                                | Male             | 108(62.07) | 66(37.93)  |
|                                    | Female           | 89(44.06)  | 113(55.94) |
| Marital status                     | Single           | 87(50.88)  | 84(49.12)  |
|                                    | Married          | 96(52.46)  | 87(47.54)  |
|                                    | Divorced         | 11(64.71)  | 6(32.29)   |
|                                    | Widowed          | 3(60.0)    | 2(40.0)    |
| Educational level                  | Diploma          | 79(59.85)  | 53(40.15)  |
|                                    | BSc              | 118(48.36) | 126(51.64) |
| Year of service                    | <5               | 59(43.38)  | 77(56.62)  |
|                                    | 5-10             | 68(53.13)  | 60(46.87)  |
|                                    | >10              | 70(62.50)  | 42(37.50)  |
| Sleeping disturbance problem       | Yes              | 141(51.46) | 133(48.54) |
|                                    | No               | 56(54.90)  | 46(45.10)  |
| Use of PPEs                        | All of the time  | 89(48.11)  | 96(51.89)  |
|                                    | Most of the time | 56(54.90)  | 46(45.10)  |
|                                    | Sometimes        | 41(56.16)  | 32(43.84)  |
|                                    | Never use        | 11(58.75)  | 5(31.25)   |
| Workload                           | Yes              | 125(58.96) | 87(41.04)  |
|                                    | No               | 72(43.90)  | 92(56.10)  |
| Length of stay/shift at work       | ≤8 hours         | 95(49.22)  | 98(50.78)  |
|                                    | 9-14 hours       | 19(54.29)  | 16(45.71)  |
|                                    | ≥15 hours        | 83(56.08)  | 65(43.92)  |
| Health & safety information access | Yes              | 148(50.86) | 143(49.14) |
|                                    | No               | 49(57.65)  | 36(42.35)  |
| Training on IP                     | Yes              | 38(42.70)  | 51(57.30)  |
|                                    | No               | 159(55.40) | 128(44.60) |

|                                              |                      |             |             |
|----------------------------------------------|----------------------|-------------|-------------|
| Availab. of safety box                       | Yes                  | 129(47.60)  | 142(52.40)  |
|                                              | No                   | 68(64.76)   | 37(35.24)   |
| Availab. of universal precaution guide line  | Yes                  | 99(46.70)   | 113(53.30)  |
|                                              | No                   | 98(59.76)   | 66(40.24)   |
| Following universal precaution guide line    | Yes                  | 42 (45.16)  | 51(54.84)   |
|                                              | No                   | 155 (54.77) | 128 (45.23) |
| Presence of contaminated sharps at workplace | Yes                  | 136(63.55)  | 78(36.45)   |
|                                              | No                   | 61(37.65)   | 101(62.35)  |
| Knowledge of standard precaution             | Adequate knowledge   | 59(44.03)   | 75(55.97)   |
|                                              | Inadequate knowledge | 138(57.02)  | 104(42.98)  |
| Job-related stress                           | Stressed             | 149(62.87)  | 88(37.13)   |
|                                              | Not stressed         | 48(34.53)   | 91(65.47)   |

241 \*BSc, Bachelor of Science; PPEs, personal protective equipments; and IP, infection  
242 prevention

### 243 Occupational exposure to sharp injuries related Attributes

244 Of the respondents who encountered occupational exposure to sharp injuries,  
245 114(57.87%) had encountered sharp injuries 1-2 times. Additionally, 69 (35.03%) of  
246 injuries occurred during abrupt movement of patients, and 86(43.65%) sharp injuries were  
247 slight skin penetration. Moreover, 93 (47.21%) of injuries were from the unknown status,  
248 and only 92 (46.70%) sharp injuries were reported to the concerned body (Table 3).

249 Table 3: Occupational exposure to sharp injuries related attributes among nurses working  
250 in South Gondar zone public hospitals, Northcentral Ethiopia, 2022 (n=376).

| Variables                      | Values                 | Frequency | Percentage (%) |
|--------------------------------|------------------------|-----------|----------------|
| Frequency of injuries occurred | 1-2 times              | 114       | 57.87          |
|                                | 3-4 times              | 71        | 36.04          |
|                                | ≥5 times               | 12        | 6.09           |
| Condition of sharps            | Dirty needles/sharps   | 74        | 37.56          |
|                                | Sterile needles/sharps | 58        | 29.45          |

|                                      |                                          |     |       |
|--------------------------------------|------------------------------------------|-----|-------|
|                                      | Both dirty & sterile needles/sharps      | 65  | 32.99 |
| How sustaining injuries              | During abrupt movement of patients       | 69  | 35.03 |
|                                      | During recapping needle after use        | 63  | 31.98 |
|                                      | During sharp collection                  | 46  | 23.35 |
|                                      | Others                                   | 19  | 9.64  |
| Type of injuries sustained           | Deep injury                              | 54  | 27.41 |
|                                      | Slight skin penetration                  | 86  | 43.65 |
|                                      | Superficial injury                       | 57  | 28.94 |
| Health status of the source patients | Known HIV/AIDS positive                  | 37  | 18.78 |
|                                      | Clinically suspected HIV/AIDS            | 40  | 20.30 |
|                                      | Clinically diagnosed hepatitis B patient | 27  | 13.17 |
|                                      | Unknown status                           | 93  | 47.21 |
| Report of the injuries               | Yes                                      | 92  | 46.70 |
|                                      | No                                       | 105 | 53.30 |

251 \*HIV/AIDS, Human immune deficiency virus/Acquired immune deficiency syndrome

## 252 **Distribution of sharp injuries by their type**

253 The types of sharps that cause injuries to nurses were intravenous needles, 64(32.49%),  
 254 intramuscular needles, 42(21.32%), suturing needles, 36(18.27%), lancets, 29 (14.72%),  
 255 surgical blades, 17 (8.63%) and scalpels, 9 (4.57%).

## 256 **Factors associated with occupational exposure to sharp injuries**

257 Nurses having above 10 years of service were 2.35 times more likely to encounter  
 258 occupational exposure to sharp injuries than nurses having less than 5 years of service  
 259 (AOR=2.35, 95%CI: 1.21,4.57). On the other hand, nurses who didn't get infection  
 260 prevention training were 1.85 times more likely to encounter occupational exposure to  
 261 sharp injuries (AOR=1.85, 95%CI: 1.09, 3.45). Additionally, nurses having job-related

262 stress were also 2.24 times more likely to be exposed for sharp injuries (AOR=2.24,  
 263 95%CI: 1.27, 3.89), and nurses who were working in the area with the presence of  
 264 contaminated sharps were 2.76 times more likely to get the chance of occupational  
 265 exposure to sharp injuries (AOR=2.76, 95%CI: 1.67, 4.72) (Table 4).

266 Table 4: Showing the association between independent variables with occupational  
 267 exposure to sharp injuries among nurses working in South Gondar zone public hospitals,  
 268 Northcentral Ethiopia, 2022 (n=376).

| Variables                                | Categories           | Sharp injuries |             | COR (95%CI)       | AOR (95%CI)           |
|------------------------------------------|----------------------|----------------|-------------|-------------------|-----------------------|
|                                          |                      | Yes (%)        | No (%)      |                   |                       |
| Sex                                      | Male                 | 108 (54.82)    | 66 (36.87)  | 2.15 (1.32,3.07)  | 1.98 (0.91,4.21)      |
|                                          | Female               | 89 (45.18)     | 113 (63.13) | 1.00              | 1.00                  |
| Year of service                          | <5                   | 59 (29.95)     | 77 (43.02)  | 1.00              | 1.00                  |
|                                          | 5-10                 | 68 (34.52)     | 60 (33.52)  | 1.46 (0.87,2.42)  | 1.38 (0.72,2.64)      |
|                                          | >10                  | 70 (35.53)     | 42 (23.46)  | 2.12 (1.26,3.49)  | 2.35 (1.21,4.57) ***  |
| Workload in the unit                     | Yes                  | 125 (63.45)    | 87 (48.60)  | 1.73 (1.15,2.52)  | 1.42 (0.83,2.45)      |
|                                          | No                   | 72 (36.55)     | 92 (51.40)  | 1.00              | 1.00                  |
| Training                                 | Yes                  | 38 (19.29)     | 51 (28.49)  | 1.00              | 1.00                  |
|                                          | No                   | 159 (80.71)    | 128 (71.51) | 2.08 (1.49, 3.13) | 1.85(1.09, 3.45) **** |
| Nurses' knowledge of standard precaution | Adequate knowledge   | 59 (29.95)     | 75 (41.90)  | 1.00              | 1.00                  |
|                                          | Inadequate knowledge | 138 (70.05)    | 104 (58.10) | 1.96 (1.31,2.94)  | 1.42 (0.79,2.39)      |
| Nurses' job stress level                 | Stressed             | 149 (75.63)    | 88 (49.16)  | 2.45 (1.62,3.67)  | 2.24 (1.27,3.89) **   |
|                                          | Not stressed         | 48 (24.37)     | 91 (50.84)  | 1.00              | 1.00                  |
| Presence of contaminated sharps          | Yes                  | 136 (69.04)    | 78 (43.58)  | 2.71 (1.79,4.09)  | 2.76 (1.67,4.72) *    |
|                                          | No                   | 61 (30.96)     | 101 (56.42) | 1.00              | 1.00                  |

269 \*Significant at P=0.000, \*\*Significant at P=0.005, \*\*\*Significant at P=0.011, and  
 270 \*\*\*\*Significant at P=0.018.

## 271 DISCUSSION

1  
2  
3 272 This study finding showed that the magnitude of occupational exposure to sharp injuries  
4  
5 273 among nurses was 52.39%. This study finding also reported that years of service >10  
6  
7 274 years, lack of infection prevention training, job-related stress, and the presence of  
8  
9 275 contaminated sharps at workplace were significantly associated with the occurrence of  
10  
11 276 occupational exposure to sharp injuries among nurses.

12  
13  
14 277 In this study, the magnitude of occupational exposure to sharp injuries among nurses was  
15  
16 278 52.39%. This finding was higher than a study conducted in three hospitals, Izmir, Turkey  
17  
18 279 (44.3%) [18], but lower than studies conducted in Public Sector Tertiary Care Hospitals  
19  
20 280 of Pakistan (67%) [26], and JUSH, Southwest Ethiopia (61.76%) [3]. This variation might  
21  
22 281 be due to the difference in study setting and period, as well as due to the difference in  
23  
24 282 infection prevention training and knowledge level of the respondents towards standard  
25  
26 283 precaution across study settings.

27  
28  
29  
30  
31 284 In this study, year of service >10 years was significantly associated with the occurrence  
32  
33 285 of occupational exposure to sharp injuries among nurses at  $p < 0.05$ . This finding was  
34  
35 286 similar with studies conducted in three hospitals, Izmir, Turkey [18], and a secondary  
36  
37 287 care hospital, Gaza Strip [27], which showed that year of service had shown significant  
38  
39 288 association with the occurrence of occupational exposure to sharp injuries among nurses  
40  
41 289 at  $p < 0.05$ . It might be due to the fact that as year of service increases, the chance of  
42  
43 290 getting occupational exposure to sharp injuries also increases.

44  
45  
46 291 This study finding also indicated that nurses who didn't get infection prevention training  
47  
48 292 were 1.85 times more likely to get the chance of occupational exposure to sharp injuries  
49  
50 293 compared to nurses who got the training. This finding was in line with a study conducted  
51  
52 294 in public hospitals of Jimma Zone, South West Ethiopia [4], which showed that nurses  
53  
54  
55  
56  
57  
58  
59  
60



1  
2  
3 295 who didn't get infection prevention training were 8.33 times more likely to get the chance  
4  
5 296 of occupational exposure to sharp injuries compared to nurses who got the training. It is  
6  
7 297 due to the fact that getting infection prevention training helps to understand and practice  
8  
9 298 the standard precaution guide line easily, which in turn reduces the chance of getting  
10  
11 299 occupational exposure to sharp injuries.

12  
13  
14 300 Similarly, this study finding also showed that job-related stress was significantly  
15  
16 301 associated with the occurrence of occupational exposure to sharp injuries among nurses.  
17  
18 302 This finding was comparable with a study conducted in JUSH, Southwest Ethiopia which  
19  
20 303 reported that job-related stress had shown significant association with the occurrence of  
21  
22 304 occupational exposure to sharp injuries among nurses [14]. It could be explained that job-  
23  
24 305 related stress might make nurses to lose their concentration and practice their daily  
25  
26 306 activities unsafely.

27  
28  
29 307 Moreover, this study finding also showed that the presence of contaminated needles and  
30  
31 308 sharp materials at workplace was also significantly associated with the occurrence of  
32  
33 309 occupational exposure to sharp injuries among nurses at  $P < 0.05$ . This finding was  
34  
35 310 congruent with a study conducted in JUSH, Southwest Ethiopia which reported that the  
36  
37 311 presence of contaminated needles and sharp materials at the workplace was significantly  
38  
39 312 associated with the occurrence of occupational exposure to sharp injuries among nurses  
40  
41 313 at  $p < 0.05$  [3]. The presence of contaminated needles and sharp materials at workplace  
42  
43 314 increases the chance of getting occupational exposure to sharp injuries among nurses in  
44  
45 315 their day-to-day workplace activities.

## 316 **Strengths and limitations of this study**

53  
54  
55  
56  
57

1  
2  
3 317 The study used census method, as a result, the findings could be strong evidence for the  
4  
5 318 problem. However, the study might be subjected to recall and social desirability biases.  
6  
7 319 The study also might not show cause and effect relationships while the study design was  
8  
9 320 cross sectional.

## 321 **CONCLUSIONS**

322 Generally, this study finding reported that the magnitude of occupational exposure to  
323 sharp injuries among nurses was high. Moreover, this study finding also showed that  
324 years of service >10 years, lack of infection prevention training, job-related stress, and  
325 the presence of contaminated sharps at workplace were independent predictors of  
326 occupational exposure to sharp injuries among nurses.

### 327 **Prevention and control strategies**

328 Continually educate the health care team: To achieve the desired infection prevention  
329 and control goals, training on infection prevention and control should be given to the staff  
330 on a continual basis covering the standard infection prevention and control precautions.

331 Conducting regular clinical audits: It used to ensure best practice of the standard infection  
332 prevention and control precautions such as proper use of personal protective equipment,  
333 disposal of used needles and other sharps and hand hygiene.

334 Creating a cleanliness culture: By building a clean culture, staff are aware of the benefits  
335 of infection prevention and control.

### 336 **Recommendations**

337 All the concerned bodies should strengthen regular provision of infection prevention  
338 training to the nurses at all levels. Stakeholders, including nursing staffs should also  
339 strengthen their efforts to work together to identify and manage the possible job-related

1  
2  
3 340 stressors among nurses. Furthermore, safety boxes should be available in each working  
4  
5 341 unit, and nurses should also practice proper use of safety box more than ever in order to  
6  
7 342 avoid the presence of contaminated needles and other sharp materials at workplace.  
8  
9

### 10 343 **Abbreviations and acronyms**

11  
12  
13 344 AIDS: Acquired Immune Deficiency Syndrome

14  
15 345 AOR: Adjusted Odds Ratio

16  
17 346 CI: Confidence Interval

18  
19 347 EBN: European Biosafety Network

20  
21 348 ENSS: Expanded Nursing Stress Scale

22  
23 349 HBV: Hepatitis B Virus

24  
25 350 HCV: Hepatitis C Virus

26  
27 351 HIV: Human Immune deficiency Virus

28  
29 352 ICU: Intensive Care Unit

30  
31 353 PPEs: Personal Protective Equipments

### 32 354 **Consent for Publication**

33  
34 355 Not applicable.

### 35 356 **Funding**

36  
37 357 Not applicable.

### 38 358 **Data availability**

39  
40 359 All data used for the study were included in the manuscript.

### 41 360 **Competing interests**

42  
43 361 We declared that we have no any conflicts of interests.

### 44 362 **Patient consent for publication**

1  
2  
3 363 Consent was obtained from the respondents.  
4

### 5 364 **Ethical approval**

6  
7  
8 365 The study involved human participants and was approved by Debre Tabor University,  
9  
10 366 College of Health Sciences, ethical review board (Ref No.CHS/048/2022). All the  
11  
12 367 respondents were informed about the purpose of the study, their right to refuse, and  
13  
14 368 written and signed voluntary consent was obtained from all the respondents prior to data  
15  
16 369 collection. The respondents were told that the information obtained from them would be  
17  
18 370 treated with complete confidentiality, and would not cause any harm to them.  
19  
20

### 21 371 **Provenance and peer review**

22  
23 372 Not commissioned; externally reviewed.  
24  
25

### 26 373 **Author Contribution**

27  
28 374 TM conceptualized the study and was involved in the design, analysis, interpretation,  
29  
30 375 report, and manuscript writing. TM and YT made a substantial contribution to the  
31  
32 376 conception, analysis, and interpretation of data. SD contribute to critical revision of the  
33  
34 377 manuscript. All the authors read and approved the final manuscript.  
35  
36  
37  
38

### 39 378 **Acknowledgement**

40  
41  
42 379 First and foremost, we would like to extend our deepest gratitude to Debre Tabor University,  
43  
44 380 college of health science, for giving us the opportunity to conduct this study.  
45  
46 381 Secondly, we would like to thank hospital administrators for their permission and unlimited  
47  
48 382 support. Lastly, we also give our heartfelt thanks to all nurses who have participated in this  
49  
50 383 study.  
51  
52  
53

54 384  
55  
56  
57  
58  
59  
60

**REFERENCES**

1. Adola SG. The Status of Sharp Injury and Risk Factors among Health Care Staffs in the Bule Hora Hospital, South Ethiopia, 2020. *Stem Cell Research International*. 2022 Apr 5;6(1):13-20.
2. Bazie GW. Factors associated with needle stick and sharp injuries among healthcare workers in North East Ethiopia. *Risk management and healthcare policy*. 2020 Nov 3:2449-56.
3. Beker J, Bamlie T. Needle Stick and sharp injuries and associated factors among nurses working in Jimma University Specialized Hospital, South West Ethiopia. *J Nurs Care*. 2015 Jan 1;4(291):2167-1168.
4. Bidira K, Woldie M, Nemera G. Prevalence and predictors of needlestick injury among nurses in public hospitals of Jimma Zone, South West Ethiopia. *Int J Nurs Midwifery*. 2014 Nov 14;6(7):90-6.
5. Getie A, Wondmieneh A, Tesfaw G. The prevalence of needlesticks and sharp injuries, and the associated factors among midwives and nurses in north wollo zone public hospitals, north east Ethiopia: An institution-based cross-sectional study. *Drug, Healthcare and Patient Safety*. 2020 Oct 15:187-93.
6. Yesuf JH, Bayou NB, Agde ZD. Magnitude of Needle Stick and Sharp Injuries and Associated Factors Among Health Care Workers in Werabe Comprehensive Specialized Hospital, Southwest Ethiopia: A Cross-Sectional study. *medRxiv*. 2022:2022-11.
7. Legesse WT, Anemaw W, Mekonen T, Nigus DM. Prevalence of needle sticks injury and its associated factors among health care workers in Bahir Dar city health

- 1  
2  
3 408 centers, Northwest Ethiopia. International Journal of Infection Control. 2015 Jun  
4  
5 409 18;11(2).  
6  
7  
8 410 8. Liyew B, Sultan M, Michael M, Tilahun AD, Kasew T. Magnitude and determinants  
9  
10 411 of needlestick and sharp injuries among nurses working in Tikur Anbessa  
11  
12 412 Specialized Hospital, Addis Ababa, Ethiopia. BioMed research international. 2020  
13  
14 413 Dec 18;2020.  
15  
16  
17 414 9. Mekonnen R, Yosef H, Teklegiorgis K, Tesfaye F, Dagne I. Magnitude and impact  
18  
19 415 of occupational related needle stick and sharp injuries and associated factors  
20  
21 416 among health care workers in Dire Dawa, Eastern Ethiopia. Med Saf Glob Health.  
22  
23 417 2018;7(1):2574-0407.  
24  
25  
26 418 10. Sharew NT, Mulu GB, Habtewold TD, Gizachew KD. Occupational exposure to  
27  
28 419 sharps injury among healthcare providers in Ethiopia regional hospitals. Annals of  
29  
30 420 occupational and environmental medicine. 2017 Dec;29(1):1-7.  
31  
32  
33 421 11. Gebremariyam BS. Determinants of occupational exposure to blood and body  
34  
35 422 fluids, healthcare workers' risk perceptions and standard precautionary practices:  
36  
37 423 a hospital-based study in Addis Ababa, Ethiopia. Ethiopian Journal of Health  
38  
39 424 Development. 2019;33(1).  
40  
41  
42 425 12. Tadesse M, Meskele M, Boltana AT. Needle-stick and sharps injuries among  
43  
44 426 health care workers in Wolaita Zone, Southern Ethiopia. Medical Safety & Global  
45  
46 427 Health. 2016;5(2):1-7.  
47  
48  
49 428 13. Manzoor I, Daud S, Hashmi NR, Sardar H, Babar MS, Rahman A, Malik M. Needle  
50  
51 429 stick injuries in nurses at a tertiary health care facility. Journal of Ayub Medical  
52  
53 430 College Abbottabad. 2010 Sep 1;22(3):174-8.  
54  
55  
56  
57  
58  
59  
60

- 1  
2  
3 431 14. Sahiledengle B, Tekalegn Y, Woldeyohannes D, Quisido BJ. Occupational  
4  
5 432 exposures to blood and body fluids among healthcare workers in Ethiopia: a  
6  
7 433 systematic review and meta-analysis. *Environmental health and preventive*  
8  
9 434 *medicine*. 2020 Dec;25(1):1-4.
- 11  
12 435 15. Mbaisi EM, Wanzala P, Omolo J. Prevalence and factors associated with  
13  
14 436 percutaneous injuries and splash exposures among health-care workers in a  
15  
16 437 provincial hospital, Kenya, 2010. *Pan African Medical Journal*. 2013 Apr 29;14(1).
- 18  
19 438 16. Isara AR, Oguzie KE, Okpogoro OE. Prevalence of needlestick injuries among  
20  
21 439 healthcare workers in the accident and emergency department of a teaching  
22  
23 440 hospital in Nigeria. *Annals of medical and health sciences research*.  
24  
25 441 2015;5(6):392-6.
- 27  
28 442 17. Jahangiri M, Rostamabadi A, Hoboubi N, Tadayon N, Soleimani A. Needle stick  
29  
30 443 injuries and their related safety measures among nurses in a university hospital,  
31  
32 444 Shiraz, Iran. *Safety and health at work*. 2016 Mar 1;7(1):72-7.
- 34  
35 445 18. Akyol A, Kargin C. Needle stick and sharp injuries among nurses. *Glob J Nurs*  
36  
37 446 *Forensic Stud*. 2016;1(109):2.
- 39  
40 447 19. Markovic-Denic L, Maksimovic N, Marusic V, Vucicevic J, Ostric I, Djuric D.  
41  
42 448 Occupational exposure to blood and body fluids among health-care workers in  
43  
44 449 Serbia. *Medical principles and Practice*. 2015 Nov 1;24(1):36-41.
- 46  
47 450 20. Cho E, Lee H, Choi M, Park SH, Yoo IY, Aiken LH. Factors associated with  
48  
49 451 needlestick and sharp injuries among hospital nurses: a cross-sectional  
50  
51 452 questionnaire survey. *International journal of nursing studies*. 2013 Aug  
52  
53 453 1;50(8):1025-32.

- 1  
2  
3 454 21. Solomon T, Lemessa D. Occupational exposure of health care workers to blood  
4  
5  
6 455 and body fluids in West Shewa Zone, Oromia, Ethiopia, 2018: A cross-sectional  
7  
8 456 study.
- 9  
10 457 22. Bekele T, Gebremariam A, Kaso M, Ahmed K. Factors associated with  
11  
12 458 occupational needle stick and sharps injuries among hospital healthcare workers  
13  
14 459 in Bale Zone, Southeast Ethiopia. PloS one. 2015 Oct 15;10(10):e0140382.
- 16  
17 460 23. Geravandi S, Alavi SM, Yari AR, Yousefi F, Hosseini SA, Kamaei S, Mohammadi  
18  
19 461 MJ, Gravand PM. Epidemiological Aspects of Needle Stick Injuries among Health  
20  
21 462 Care Workers in Razi Hospital Ahvaz, Iran, in 2015. Archives of Hygiene Sciences.  
22  
23 463 2016 Apr 1;5(2).
- 25  
26 464 24. Tebeje B, Hailu C. Assessment of HIV post-exposure prophylaxis use among  
27  
28 465 health workers of governmental health institutions in Jimma Zone, Oromiya  
29  
30 466 Region, Southwest Ethiopia. Ethiopian journal of health sciences. 2010;20(1).
- 32  
33 467 25. Aderaw Z. Assessment on magnitude of needle stick and sharp injuries and  
34  
35 468 associated factors among health care workers in East Gojjam zone health  
36  
37 469 institutions, Amahara Regional State, Ethiopia. Global journal of medical research.  
38  
39 470 2013;13(3):41-9.
- 41  
42 471 26. Habib H, Khan EA, Aziz A. Prevalence and factors associated with needle stick  
43  
44 472 injuries among registered nurses in public sector tertiary care hospitals of Pakistan.  
45  
46 473 International Journal of Collaborative Research on Internal Medicine & Public  
47  
48 474 Health. 2011 Feb 1;3(2):124-30.
- 50  
51  
52  
53  
54  
55  
56  
57  
58  
59  
60



1  
2  
3 475 27. Elsous A, Ouda M, Mohsen S, Al-Shaikh M, Mokayad S, Hamad AA. Needle stick  
4  
5 476 injuries among nurses of secondary care hospital: A cross-sectional study from  
6  
7 477 Gaza Strip. *Annals of International Medical and Dental Research*. 2016;2(2):54.  
8  
9

10 478 **Figure 1:** Map of South Gondar Zone (Source; Ethio GIS, 1994).  
11  
12 479

For peer review only

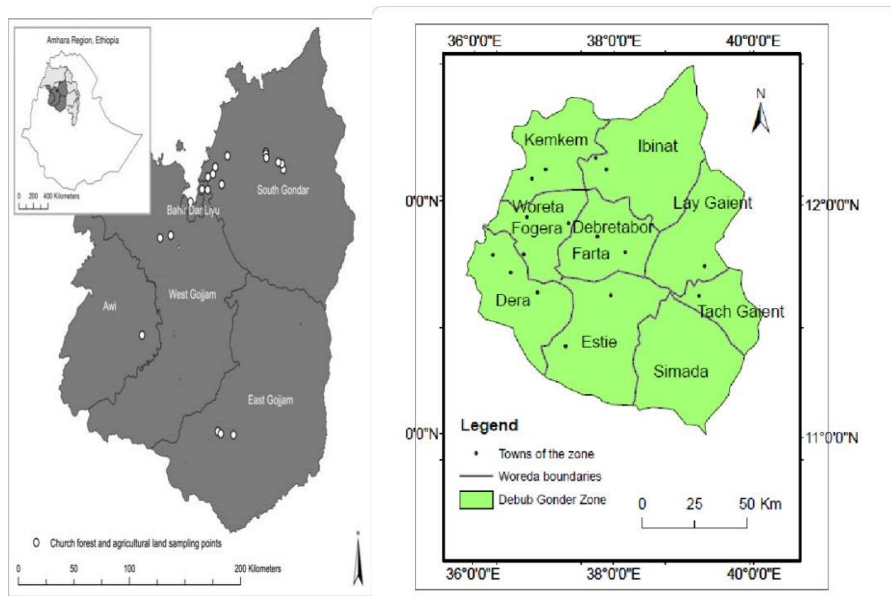

Figure 1: Map of South Gondar Zone (Source; Ethio GIS, 1994)

er review only

# Reporting checklist for cross sectional study.

Based on the STROBE cross sectional guidelines.

## Instructions to authors

Complete this checklist by entering the page numbers from your manuscript where readers will find each of the items listed below.

Your article may not currently address all the items on the checklist. Please modify your text to include the missing information. If you are certain that an item does not apply, please write "n/a" and provide a short explanation.

Upload your completed checklist as an extra file when you submit to a journal.

In your methods section, say that you used the STROBE cross sectional reporting guidelines, and cite them as:

von Elm E, Altman DG, Egger M, Pocock SJ, Gøtzsche PC, Vandenbroucke JP. The Strengthening the Reporting of Observational Studies in Epidemiology (STROBE) Statement: guidelines for reporting observational studies.

|                           |                     |                                                                                                                                    | Page<br>Number |
|---------------------------|---------------------|------------------------------------------------------------------------------------------------------------------------------------|----------------|
| <b>Title and abstract</b> |                     |                                                                                                                                    |                |
| Title                     | <a href="#">#1a</a> | Indicate the study's design with a commonly used term in the title or the abstract                                                 | 1              |
| Abstract                  | <a href="#">#1b</a> | Provide in the abstract an informative and balanced summary of what was done and what was found                                    | 1              |
| <b>Introduction</b>       |                     |                                                                                                                                    |                |
| Background /<br>rationale | <a href="#">#2</a>  | Explain the scientific background and rationale for the investigation being reported                                               | 1-3            |
| Objectives                | <a href="#">#3</a>  | State specific objectives, including any prespecified hypotheses                                                                   | 4              |
| <b>Methods</b>            |                     |                                                                                                                                    |                |
| Study design              | <a href="#">#4</a>  | Present key elements of study design early in the paper                                                                            | 4              |
| Setting                   | <a href="#">#5</a>  | Describe the setting, locations, and relevant dates, including periods of recruitment, exposure, follow-up,<br>and data collection | 4              |

|    |                      |                      |                                                                                                              |     |
|----|----------------------|----------------------|--------------------------------------------------------------------------------------------------------------|-----|
| 1  | Eligibility criteria | <a href="#">#6a</a>  | Give the eligibility criteria, and the sources and methods of selection of participants.                     | 5   |
| 2  |                      |                      |                                                                                                              |     |
| 3  |                      |                      |                                                                                                              |     |
| 4  |                      | <a href="#">#7</a>   | Clearly define all outcomes, exposures, predictors, potential confounders, and effect modifiers. Give        | 5-6 |
| 5  |                      |                      | diagnostic criteria, if applicable                                                                           |     |
| 6  |                      |                      |                                                                                                              |     |
| 7  |                      |                      |                                                                                                              |     |
| 8  | Data sources /       | <a href="#">#8</a>   | For each variable of interest give sources of data and details of methods of assessment (measurement).       | 6-7 |
| 9  | measurement          |                      | Describe comparability of assessment methods if there is more than one group. Give information separately    |     |
| 10 |                      |                      | for for exposed and unexposed groups if applicable.                                                          |     |
| 11 |                      |                      |                                                                                                              |     |
| 12 |                      |                      |                                                                                                              |     |
| 13 |                      |                      |                                                                                                              |     |
| 14 | Bias                 | <a href="#">#9</a>   | Describe any efforts to address potential sources of bias                                                    | 7   |
| 15 |                      |                      |                                                                                                              |     |
| 16 |                      |                      |                                                                                                              |     |
| 17 | Study size           | <a href="#">#10</a>  | Explain how the study size was arrived at                                                                    | 5   |
| 18 |                      |                      |                                                                                                              |     |
| 19 | Quantitative         | <a href="#">#11</a>  | Explain how quantitative variables were handled in the analyses. If applicable, describe which groupings     | 7-8 |
| 20 | variables            |                      | were chosen, and why                                                                                         |     |
| 21 |                      |                      |                                                                                                              |     |
| 22 |                      |                      |                                                                                                              |     |
| 23 |                      |                      |                                                                                                              |     |
| 24 | Statistical methods  | <a href="#">#12a</a> | Describe all statistical methods, including those used to control for confounding                            | 7-8 |
| 25 |                      |                      |                                                                                                              |     |
| 26 |                      |                      |                                                                                                              |     |
| 27 | Statistical methods  | <a href="#">#12b</a> | Describe any methods used to examine subgroups and interactions                                              | 7-8 |
| 28 |                      |                      |                                                                                                              |     |
| 29 | Statistical methods  | <a href="#">#12c</a> | Explain how missing data were addressed                                                                      | 7-8 |
| 30 |                      |                      |                                                                                                              |     |
| 31 |                      |                      |                                                                                                              |     |
| 32 | Statistical methods  | <a href="#">#12d</a> | If applicable, describe analytical methods taking account of sampling strategy                               | 7-8 |
| 33 |                      |                      |                                                                                                              |     |
| 34 | Statistical methods  | <a href="#">#12e</a> | Describe any sensitivity analyses                                                                            | 7-8 |
| 35 |                      |                      |                                                                                                              |     |
| 36 |                      |                      |                                                                                                              |     |
| 37 | <b>Results</b>       |                      |                                                                                                              |     |
| 38 |                      |                      |                                                                                                              |     |
| 39 |                      |                      |                                                                                                              |     |
| 40 | Participants         | <a href="#">#13a</a> | Report numbers of individuals at each stage of study—eg numbers potentially eligible, examined for           | 9   |
| 41 |                      |                      | eligibility, confirmed eligible, included in the study, completing follow-up, and analysed. Give information |     |
| 42 |                      |                      | separately for for exposed and unexposed groups if applicable.                                               |     |
| 43 |                      |                      |                                                                                                              |     |
| 44 |                      |                      |                                                                                                              |     |
| 45 |                      |                      |                                                                                                              |     |
| 46 | Participants         | <a href="#">#13b</a> | Give reasons for non-participation at each stage                                                             | 9   |
| 47 |                      |                      |                                                                                                              |     |
| 48 |                      |                      |                                                                                                              |     |
| 49 | Participants         | <a href="#">#13c</a> | Consider use of a flow diagram                                                                               | 10  |
| 50 |                      |                      |                                                                                                              |     |
| 51 | Descriptive data     | <a href="#">#14a</a> | Give characteristics of study participants (eg demographic, clinical, social) and information on exposures   | 10  |
| 52 |                      |                      | and potential confounders. Give information separately for exposed and unexposed groups if applicable.       |     |
| 53 |                      |                      |                                                                                                              |     |
| 54 |                      |                      |                                                                                                              |     |
| 55 |                      |                      |                                                                                                              |     |
| 56 | Descriptive data     | <a href="#">#14b</a> | Indicate number of participants with missing data for each variable of interest                              | 10  |
| 57 |                      |                      |                                                                                                              |     |
| 58 |                      |                      |                                                                                                              |     |
| 59 |                      |                      |                                                                                                              |     |
| 60 |                      |                      |                                                                                                              |     |

|    |                   |                      |                                                                                                                    |       |
|----|-------------------|----------------------|--------------------------------------------------------------------------------------------------------------------|-------|
| 1  | Outcome data      | <a href="#">#15</a>  | Report numbers of outcome events or summary measures. Give information separately for exposed and                  | 10-12 |
| 2  |                   |                      | unexposed groups if applicable.                                                                                    |       |
| 3  |                   |                      |                                                                                                                    |       |
| 4  |                   |                      |                                                                                                                    |       |
| 5  | Main results      | <a href="#">#16a</a> | Give unadjusted estimates and, if applicable, confounder-adjusted estimates and their precision (eg, 95%           | 13-14 |
| 6  |                   |                      | confidence interval). Make clear which confounders were adjusted for and why they were included                    |       |
| 7  |                   |                      |                                                                                                                    |       |
| 8  |                   |                      |                                                                                                                    |       |
| 9  |                   |                      |                                                                                                                    |       |
| 10 | Main results      | <a href="#">#16b</a> | Report category boundaries when continuous variables were categorized                                              | 13-14 |
| 11 |                   |                      |                                                                                                                    |       |
| 12 | Main results      | <a href="#">#16c</a> | If relevant, consider translating estimates of relative risk into absolute risk for a meaningful time period       | 13-14 |
| 13 |                   |                      |                                                                                                                    |       |
| 14 |                   |                      |                                                                                                                    |       |
| 15 | Other analyses    | <a href="#">#17</a>  | Report other analyses done—e.g., analyses of subgroups and interactions, and sensitivity analyses                  | 13-14 |
| 16 |                   |                      |                                                                                                                    |       |
| 17 |                   |                      |                                                                                                                    |       |
| 18 | Discussion        |                      |                                                                                                                    |       |
| 19 |                   |                      |                                                                                                                    |       |
| 20 | Key results       | <a href="#">#18</a>  | Summarise key results with reference to study objectives                                                           | 13-14 |
| 21 |                   |                      |                                                                                                                    |       |
| 22 |                   |                      |                                                                                                                    |       |
| 23 | Limitations       | <a href="#">#19</a>  | Discuss limitations of the study, taking into account sources of potential bias or imprecision. Discuss both       | 17    |
| 24 |                   |                      | direction and magnitude of any potential bias.                                                                     |       |
| 25 |                   |                      |                                                                                                                    |       |
| 26 |                   |                      |                                                                                                                    |       |
| 27 | Interpretation    | <a href="#">#20</a>  | Give a cautious overall interpretation considering objectives, limitations, multiplicity of analyses, results from | 14-17 |
| 28 |                   |                      | similar studies, and other relevant evidence.                                                                      |       |
| 29 |                   |                      |                                                                                                                    |       |
| 30 |                   |                      |                                                                                                                    |       |
| 31 |                   |                      |                                                                                                                    |       |
| 32 | Generalisability  | <a href="#">#21</a>  | Discuss the generalisability (external validity) of the study results                                              | 17    |
| 33 |                   |                      |                                                                                                                    |       |
| 34 | Other Information |                      |                                                                                                                    |       |
| 35 |                   |                      |                                                                                                                    |       |
| 36 |                   |                      |                                                                                                                    |       |
| 37 | Funding           | <a href="#">#22</a>  | Give the source of funding and the role of the funders for the present study and, if applicable, for the original  | 18    |
| 38 |                   |                      | study on which the present article is based                                                                        |       |
| 39 |                   |                      |                                                                                                                    |       |
| 40 |                   |                      |                                                                                                                    |       |

41  
42 The STROBE checklist is distributed under the terms of the Creative Commons Attribution License CC-BY. This checklist was completed on 10. March  
43 2023 using <https://www.goodreports.org/>, a tool made by the [EQUATOR Network](#) in collaboration with [Penelope.ai](#)  
44  
45  
46  
47  
48  
49  
50  
51  
52  
53  
54  
55  
56  
57  
58  
59  
60
